1 **Histone H3 deacetylation promotes host cell viability for efficient infection by**  
2 ***Listeria monocytogenes***

3 Matthew J.G. Eldridge<sup>1</sup> and Mélanie A. Hamon<sup>1,\*</sup>

4 From the <sup>1</sup>Pasteur, Chromatine et Infection G5, Paris, France

5 \*Lead Contact and correspondence: [melanie.hamon@pasteur.fr](mailto:melanie.hamon@pasteur.fr) (M.A.H.)

6 Running Title – Maintenance of host genome integrity by *Listeria*

---

7 **ABSTRACT**

8 For many intracellular bacterial pathogens manipulating host cell survival is essential  
9 for maintaining a replicative niche, and is a common strategy used to promote  
10 infection. The bacterial pathogen *Listeria monocytogenes* is well known to hijack host  
11 machinery for its own benefit, such as targeting the host histone H3 for modification  
12 by SIRT2. However, in what way this modification benefits infection, as well as the  
13 molecular players involved, remain unknown. Here we show that SIRT2 activity  
14 supports *Listeria* intracellular survival by maintaining genome integrity and host cell  
15 viability. This protective effect is dependent on H3K18 deacetylation, which  
16 safeguards the host genome by counteracting infection-induced DNA damage.  
17 Mechanistically, infection causes SIRT2 to interact with the nucleic acid binding  
18 protein TDP-43 and localise to genomic R-loops, where H3K18 deacetylation occurs.  
19 This work highlights novel functions of TDP-43 and R-loops during bacterial infection  
20 and identifies the mechanism through which *L. monocytogenes* co-opts SIRT2 to allow  
21 efficient infection.

22

---

23 **Keywords:** Histone deacetylation/DNA damage/Infection/*Listeria monocytogenes*/R-  
24 loops/TDP-43

## 25 INTRODUCTION

26 The Sirtuin family (SIRT1-7) of NAD<sup>+</sup>-dependent deacetylases play key roles in  
27 many biological processes which are required to maintain cellular homeostasis, such  
28 as cell cycle, metabolism and DNA repair (Houtkooper *et al*, 2012; Gomes *et al*, 2015).  
29 Sirtuins have distinct subcellular localisations and divergent functional roles; however,  
30 they all regulate DNA and chromatin to various extents, particularly in response to DNA  
31 damage (Houtkooper *et al*, 2012). Despite their broad roles across different cellular  
32 compartments, mouse knockout models for all Sirtuins have emphasised their  
33 essential role in maintaining genome stability and cell survival in response to stress  
34 (Bosch-Presegué & Vaquero, 2014). As such, loss of individual Sirtuins is strongly  
35 associated with increased genome instability, and knockout mice often develop  
36 chromosomal aberrations and are predisposed to spontaneous tumorigenesis. The  
37 safeguarding of genomic stability by Sirtuins occurs in numerous ways including  
38 regulation of metabolic responses to stress, control of cell cycle checkpoints or  
39 adjustment of DNA damage signalling and repair through histone deacetylation  
40 (Bosch-Presegué & Vaquero, 2014).

41 Sirtuins 1, 6 and 7 display predominantly nuclear localisations, and as such  
42 have the most clearly defined roles in DNA damage responses. *Sirt1*<sup>-/-</sup> cells have a  
43 reduced capacity to form DNA repair foci and fail to efficiently repair  $\gamma$ -radiation-  
44 induced DNA damage (Wang *et al*, 2008). This effect is believed to be driven by  
45 deregulation of chromatin dynamics via histone deacetylation, and repair proteins such  
46 as KU70 (Jeong *et al*, 2007), WRN (Chen *et al*, 2003) and XPA (Fan & Luo, 2010).  
47 SIRT6 can act as a DNA damage sensor which directly binds DNA breaks and  
48 promotes repair protein recruitment (Onn *et al*, 2020). Additionally, SIRT6 has been  
49 described to maintain the integrity of pericentric genomic regions through H3 lysine 18  
50 (H3K18) deacetylation (Tasselli *et al*, 2016). Similarly, SIRT7 promotes the  
51 recruitment of the repair protein 53BP1 to sites of DNA damage which requires H3K18  
52 deacetylation, and enhances non-homologous end joining (NHEJ) (Vazquez *et al*,  
53 2016). However, SIRT7 lacks an ability to directly bind damaged DNA and instead  
54 requires Poly [ADP-ribose] polymerase 1 (PARP1) to localise to double strand breaks  
55 (Onn *et al*, 2020; Vazquez *et al*, 2016). By comparison, the mitochondrial Sirtuins have  
56 a more indirect role in preserving DNA stability. SIRT3 protects mtDNA by limiting  
57 mitochondrial superoxide levels (Kim *et al*, 2010) and positively regulating the DNA  
58 repair protein OGG1 (Cheng *et al*, 2013), while SIRT4 represses mitochondrial

59 glutamine metabolism in response to genotoxic stress, thus promoting cell cycle arrest  
60 and allowing for more efficient DNA repair (Jeong *et al*, 2013).

61 Sirtuin 2 (SIRT2) is unique, as it is the only member of the family to hold a  
62 predominantly cytoplasmic localisation and have clear regulatory roles across multiple  
63 subcellular compartments, functioning in metabolism, cell cycle, inflammation, and  
64 oxidative stress responses (Lemos *et al*, 2017; Gomes *et al*, 2015; de Oliveira *et al*,  
65 2012). However, SIRT2 is continuously shuttled between the cytosol and nuclear  
66 compartment, where it regulates nuclear proteins, such as p300 and p53 (Tanno *et al*,  
67 2007; North & Verdin, 2007; Eldridge *et al*, 2020b; Peck *et al*, 2010; Black *et al*, 2008),  
68 and histones by deacetylation (Vaquero *et al*, 2006; Eskandarian *et al*, 2013).  
69 Furthermore, during mitosis SIRT2 accumulates in the nucleus, and becomes enriched  
70 at chromatin, where it deacetylates histone H4 lysine 16 (Inoue *et al*, 2007; Vaquero  
71 *et al*, 2006). As such, most of the described functions of SIRT2 in regulating DNA  
72 damage occur in the context of cell cycle progression and cell division. For instance,  
73 SIRT2-dependent H4K16 deacetylation has been shown to regulate H4K20me1  
74 deposition, which in turn affects cell cycle checkpoint progression and reduces DNA  
75 damage accumulation during mitosis (Serrano *et al*, 2013). Similarly, SIRT2 promotes  
76 the activity of the anaphase-promoting complex/cyclosome (APC/C), which protects  
77 against mitotic catastrophe and promotes genome stability (Kim *et al*, 2011).  
78 Additionally, during the G2/M cell cycle checkpoint SIRT2 promotes CDK9 function  
79 which prevents the breakdown of stalled replication forks and arrests the cell cycle to  
80 allow additional time for DNA repair (Zhang *et al*, 2013). These reports point to SIRT2  
81 having essential roles in maintaining genome stability which are linked to its nuclear  
82 accumulation during mitosis, but similar roles during interphase have not been shown.

83 Our previous work identified a novel function of SIRT2 during infection with the  
84 bacterial pathogen *Listeria monocytogenes*. Infection triggers nuclear accumulation of  
85 SIRT2, where it becomes enriched on chromatin at transcriptional start sites (TSSs) of  
86 specific genes and induces deacetylation of H3K18 independently of the cell cycle  
87 (Eskandarian *et al*, 2013). Nuclear import of SIRT2 during infection is mediated in part  
88 by importin IPO7, and chromatin binding requires the dephosphorylation of SIRT2 at  
89 serine 25, allowing for H3K18 deacetylation (Pereira *et al*, 2018; Eldridge *et al*, 2020b).  
90 Importantly, SIRT2 activity at chromatin is essential for efficient *L. monocytogenes*  
91 infection in vitro and in vivo. However, how bacterial hijacking of SIRT2 promotes  
92 infection remains unknown. Given the roles of Sirtuins and H3K18 deacetylation in

93 maintaining genome integrity, we reasoned that SIRT2 might function similarly during  
94 *L. monocytogenes* infection, in turn promoting host cell viability in order to better  
95 maintain the replicative niche (Ashida *et al*, 2011; Friedrich *et al*, 2017; Pirbhai *et al*,  
96 2006; Behar & Briken, 2019; Knodler *et al*, 2005; Yan *et al*, 2009).

97 In this study we show that SIRT2 activity protects host cells from DNA damage  
98 and promotes host cell survival. We further show that the interaction with the DNA/RNA  
99 binding protein TDP-43 is essential for SIRT2 enrichment at the transcription start site  
100 (TSS) of specific genes and H3K18 deacetylation during infection. Mechanistically, we  
101 find that SIRT2 and TDP-43 function with DNA:RNA hybrids called R-loops to reduce  
102 the accumulation of host DNA damage caused by infection. Therefore, we show that  
103 during infection, the activity of SIRT2 on H3K18 is key in regulating cellular health,  
104 which is exploited by *L. monocytogenes* to maintain host genome integrity and cell  
105 viability thereby promoting infection.

106

## 107 **RESULTS**

### 108 **SIRT2 activity maintains host cell viability during infection**

109 Sirtuins have long been established to promote cell viability by maintaining  
110 genome stability. We were therefore interested in measuring cell viability during  
111 infection upon inhibition of SIRT2 activity. We performed an Alamar blue assay to  
112 measure the metabolic activity of HeLa cells, under uninfected and infected conditions,  
113 with and without SIRT2 inhibitor AGK2. Interestingly, infection with *L. monocytogenes*  
114 caused no reduction in host cell viability at either 6 or 24 hours post infection. However,  
115 in the presence of AGK2, a SIRT2 inhibitor, infected cells exhibited a significant  
116 reduction in viability (Fig. 1A). After 6 hours of infection, a slight 10% decrease in  
117 viability is detected in AGK2 treated cells, and by 24 hours cell viability is significantly  
118 decreased by 30% as compared with uninfected cells (Fig. 1A). Importantly, AGK2  
119 treatment alone did not lead to a decrease in cell viability (Fig. 1A). Supporting this  
120 data, we performed cell counting assays at 6 h and 24 h post infection and were able  
121 to show that a higher proportion of dead cells were recovered at these time points (Fig.  
122 S1A). Therefore, although *L. monocytogenes* infection alone does not significantly  
123 impact cell viability, blocking SIRT2 activity during infection leads to significant cell  
124 death.

125

### 126 **SIRT2 activity on H3K18 protects cells from infection-induced DNA damage**

127           Since SIRT2 displays a cell protective effect during *L. monocytogenes* infection,  
128 we examined the consequences of SIRT2 inhibition on the DNA damage response.  
129 We monitored the accumulation of DNA damage by measuring the nuclear  
130 fluorescence intensity of the DNA damage marker  $\gamma$ H2AX during late infection, in the  
131 presence or absence of the SIRT2 inhibitor AGK2.

132           Consistent with previous reports, *L. monocytogenes* infection induces low levels  
133 of DNA damage illustrated by an increase of  $\gamma$ H2AX in host cell nuclei (Fig. 1B and  
134 S1B). At 24 hours post infection we observed a 15% increase in number of  $\gamma$ H2AX  
135 positive cells as compared with uninfected conditions, accompanied by ~1.5-fold  
136 increase in  $\gamma$ H2AX mean fluorescence intensity (MFI) across the cell population (Fig.  
137 1B, S1B and S1C). In uninfected cells treated with AGK2 there was no significant  
138 increase in  $\gamma$ H2AX staining, suggesting that under resting conditions SIRT2 has no  
139 significant effect on the induction of DNA damage. By contrast, infected AGK2-treated  
140 cells accumulated significantly higher levels of DNA damage by 24 hours post  
141 infection, as evidenced by a 35% increase in the number of  $\gamma$ H2AX positive cells and  
142 a concurrent ~4-fold increase in the average nuclear  $\gamma$ H2AX MFI (Fig. 1B, S1C and  
143 S1D). These data indicate that SIRT2 activity suppresses the accumulation of DNA  
144 damage during infection.

145           The impact of SIRT2 on infection-induced DNA damage was also determined  
146 in vivo. Spleens from wildtype and *Sirt2*<sup>-/-</sup> mice were collected 72 hours after  
147 intravenous infection with *L. monocytogenes* and levels of  $\gamma$ H2AX were assessed by  
148 immunoblotting. As expected, spleens from infected *Sirt2*<sup>-/-</sup> mice had significantly  
149 higher levels of H3K18-ac and showed a trend towards lower bacterial numbers  
150 compared with wildtype mice (Fig. 1C and S1E). Similarly to what is observed during  
151 in vitro infection, levels of  $\gamma$ H2AX were also significantly higher in *Sirt2*<sup>-/-</sup> mice (Fig. 1C).  
152 Therefore, the role of SIRT2 in reducing DNA damage is detected in vivo, within organs  
153 that are targeted during infection.

154           We further wanted to determine whether it was the general activity of SIRT2  
155 that was suppressing DNA damage or the specific deacetylation of H3K18. To answer  
156 this question, we infected cells overexpressing GFP-tagged wildtype histone H3, or  
157 mutants where K18 was substituted with either glutamine (K18Q) or alanine (K18A)  
158 which respectively mimic acetylated and deacetylated H3K18. Under these conditions,  
159 DNA damage was measured by  $\gamma$ H2AX immunoblotting. Upon transfection and  
160 expression of wildtype H3, DNA damage is observed only in infected cells that are

161 AGK2-treated (Fig. 1D), similarly to what is observed by immunofluorescence under  
162 untransfected conditions (Fig. 1B). Alone, the expression of either mutant H3 K18Q or  
163 H3 K18A did not induce any significant increase in  $\gamma$ H2AX levels in resting cells.  
164 Strikingly though, upon infection, expression of H3 K18Q is sufficient to induce higher  
165 levels of  $\gamma$ H2AX (Fig. 1D), similar to the levels induced by AGK2 treatment. By contrast,  
166 expression of H3K18A does not increase  $\gamma$ H2AX upon infection and, in fact, blocks  
167  $\gamma$ H2AX accumulation observed in AGK2 treated cells. These results suggest that  
168 deacetylation of H3K18 has a direct protective role against the accumulation of  
169 excessive DNA damage. Therefore, early recruitment of SIRT2 to DNA and its activity  
170 towards H3K18 is required to respond to infection-induced genotoxic stress.

171

### 172 ***SIRT2 interacts with TDP-43 for recruitment to chromatin***

173 Our previous work showed that H3K18 deacetylation by SIRT2 occurs  
174 specifically at the TSSs of a subset of genes which are repressed during infection.  
175 However, SIRT2 does not display DNA binding properties. To identify interacting  
176 partners which could anchor SIRT2 to DNA we mined the previously published SIRT2  
177 interactome (Eldridge *et al*, 2020b). Using the GeneCards database, we compiled lists  
178 of proteins known to interact with the TSSs of 5 different genes that are regulated by  
179 SIRT2 during infection (*MYLIP*, *ERCC5*, *LEF1*, *SYDE2*, *EHHADH*). We then compared  
180 these against the SIRT2 interactome to identify common proteins. One SIRT2-putative  
181 interactor which was common across all lists was TDP-43 (encoded by *TARDBP* gene)  
182 a DNA/RNA binding protein (Fig. S2). Further in silico analysis of previously identified  
183 infection-dependent SIRT2-repressed genes (Eskandarian *et al*, 2013) showed that  
184 72% of these have TDP-43 present at their TSSs by ChIP-seq (ENCODE portal).  
185 Therefore TDP-43 represented a suitable candidate protein to recruit SIRT2 to  
186 chromatin at specific loci during *L. monocytogenes* infection.

187 To determine whether TDP-43 interacts with SIRT2 upon infection, HeLa cells  
188 were transfected with plasmids encoding GFP alone or GFP-tagged SIRT2 (SIRT2-  
189 GFP), then left uninfected or infected with *L. monocytogenes* followed by  
190 immunoprecipitation from isolated nuclei. Immunoblotting analysis showed that  
191 endogenous TDP-43 co-precipitates with SIRT2-GFP but not GFP alone in uninfected  
192 cells (Fig. 2A). Interestingly, following infection, TDP-43 binding to SIRT2 is further  
193 enriched by approximately 2-fold (Fig. 2A). Consistent with our previous interactome  
194 analysis these data show that a basal interaction between SIRT2 and TDP-43 occurs

195 in the nuclei of uninfected cells, and we now show that this interaction is significantly  
196 enhanced in response to *L. monocytogenes* infection.

197 We previously identified Ser25 as a residue on SIRT2 that was  
198 dephosphorylated upon infection and that this modification was necessary for SIRT2  
199 to become enriched at chromatin (Pereira *et al*, 2018). Therefore, this post-  
200 translational modification could be involved in regulating the interaction between SIRT2  
201 and TDP-43. To address this, we co-transfected HeLa cells with mCherry-TDP-43 and  
202 either WT SIRT2-GFP, phosphomimetic S25E SIRT2-GFP, or dephosphomimetic  
203 S25A SIRT2-GFP. Immunoprecipitation from cells with RFP-Trap beads followed by  
204 immunoblotting showed that all SIRT2 variants could interact TDP-43. Furthermore,  
205 both SIRT2 variants displayed an augmented interaction with TDP-43, particularly the  
206 S25A dephosphomimetic displayed a ~2.5-fold increase in its interaction with TDP-43  
207 as compared with the WT variant. This increase is similar to that observed following  
208 infection, suggesting that S25 dephosphorylation has a role in regulating this interface  
209 between SIRT2 and TDP-43 (Fig. S3).

210 We further wanted to establish whether TDP-43 was required for SIRT2-binding  
211 to DNA. Chromatin immunoprecipitation PCR (ChIP-PCR) of endogenous TDP-43  
212 from uninfected HeLa cells showed that TDP-43 localises to the TSSs of SIRT2-  
213 regulated genes *MYLIP*, *ERRC5*, *LEF1*, *SYDE2* and *EHHADH*, consistent with multiple  
214 ChIP-seq data sets available from the ENCODE project database (Davis *et al*, 2018).  
215 Following *L. monocytogenes* infection TDP-43 shows a slight, and in most cases  
216 significant, enrichment of ~10% at these genetic loci (Fig. 2B). By comparison *ARAP2*,  
217 a SIRT2 independent gene, does not show TDP-43 recruitment upon infection. To  
218 determine whether TDP-43 is necessary for the recruitment of SIRT2 to chromatin, we  
219 performed ChIP-PCR of GFP tagged SIRT2 from uninfected and infected cells  
220 transfected with either scramble or TDP-43 (*TARDBP*) targeting siRNA. For all tested  
221 genes, knockdown of TDP-43 does not change the basal level of SIRT2 recruitment in  
222 uninfected cells (Fig. 2C). As previously demonstrated, infection causes significant  
223 recruitment of SIRT2 to the TSSs of *MYLIP*, *ERRC5*, *LEF1*, *SYDE2* and *EHHADH* but  
224 not *ARAP2*. However, during infection, loss of TDP-43 from cells significantly reduces  
225 the recruitment of SIRT2 to the TSSs of these genes by ~5-15%. By contrast, the  
226 SIRT2 activity-independent gene *ARAP2* shows a decrease in SIRT2 enrichment  
227 during infection which is not altered by the loss of TDP-43 (Fig. 2C). These data show  
228 that whilst TDP-43 is not required for the basal localisation of SIRT2 to chromatin in

229 resting cells, the specific interaction and enrichment of SIRT2 which occurs following  
230 infection is dependent on TDP-43, and loss of TDP-43 dysregulates SIRT2-chromatin  
231 dynamics (Fig. 2C and S4B). Taken together these data show that infection enhances  
232 the interaction between SIRT2 and TDP-43 in the nucleus, and that TDP-43 is  
233 necessary for the infection-induced enrichment of SIRT2 at chromatin level to specific  
234 genetic locations.

235

### 236 **TDP-43 is required for SIRT2-dependent functions during infection**

237 In the context of *L. monocytogenes* infection, our data strongly suggests that  
238 TDP-43 acts as a scaffold for SIRT2 recruitment to specific gene loci, and therefore  
239 would be essential for enabling SIRT2-dependent processes and related downstream  
240 phenotypes. 48 hours prior to infection HeLa cells were transfected with scrambled  
241 siRNA or a pool of three siRNAs which target either *SIRT2* or *TARDBP* mRNA,  
242 reducing their respective levels by ~70% and 90% (Fig. S4A and S4B). As expected,  
243 in HeLa cells transfected with scramble siRNA, H3K18 deacetylation occurred normally  
244 during infection. Global H3K18-ac levels decreased by 30-40% as compared with  
245 uninfected cells (Fig. 3A). However, this decrease in acetylation levels was blocked in  
246 *TARDBP* silenced cells similarly to what was observed upon *SIRT2* silencing (Fig. 3A).  
247 Therefore, TDP-43 is required for SIRT2-dependent H3K18 deacetylation during  
248 infection.

249 We previously showed that SIRT2 activity is required to promote bacterial  
250 replication/survival in host cells, which is attenuated by enzymatic inhibition or genetic  
251 silencing of SIRT2 and results in lower recovered CFUs upon a 24h infection  
252 (Eskandarian *et al*, 2013; Pereira *et al*, 2018). Silencing of SIRT2 expression has no  
253 impact on early *Lm* invasion (Fig. S4C), however at later time points (24 hr p.i.) 30%  
254 fewer bacteria are recovered from cells transfected with SIRT2 siRNA compared with  
255 scramble controls (Fig. 3B) We performed similar experiments upon silencing of TDP-  
256 43 to assess *Lm* replication/survival during the later stages of infection in cultured cells.  
257 We obtained a similar reduction in bacterial numbers 24-hours post infection upon  
258 *TARDBP* knockdown as with *SIRT2* knockdown, where 50% fewer bacteria were  
259 recovered relative to scramble controls (Fig. 3B). Therefore, these results show that,  
260 like SIRT2, loss of TDP-43 has a negative impact on bacterial replication/survival within  
261 host cells and is therefore required to promote *Lm* infection. Altogether, our data  
262 demonstrate that TDP-43 is required for the execution of SIRT2-dependent H3K18



263 deacetylation during infection, and for the advantage SIRT2 can confer to *L.*  
264 *monocytogenes* during infection.

265

### 266 **R-loops are required for infection induced H3K18 deacetylation**

267 TDP-43 is a nuclear DNA/RNA binding protein which specifically recognises single  
268 stranded nucleic acids. Recently, TDP-43 has been shown to interact with nucleic acid  
269 structures called R-loops, which preferentially form at TSSs when newly transcribed  
270 RNA anneals to the coding strand of DNA forming an RNA:DNA hybrid, and displaces  
271 a strand of ssDNA. To study the role of R-loops during infection, we overexpressed  
272 RNaseH1, an enzyme which resolves DNA/RNA-hybrids. Cells were transfected either  
273 with a mCherry control plasmid (pICE-mCherry-NLS) or a RNaseH1 expressing  
274 plasmid (pICE-RNaseH1-WT-NLS), and H3K18 deacetylation was monitored by  
275 immunoblotting. Expression of the control mCherry plasmid had no effect on the  
276 previously observed infection-induced H3K18 deacetylation. However, cells  
277 overexpressing RNaseH1 displayed no difference in acetylation levels, demonstrating  
278 that RNaseH1 expression blocks infection-induced deacetylation. In contrast, cells  
279 transfected with catalytically inactive mutant RNaseH1 ((pICE-RNaseH1-D10R, E48R-  
280 NLS) regained the ability to deacetylate H3K18 upon infection (Fig. 4A), which  
281 demonstrates that only catalytically active RNaseH1 blocks H3K18 deacetylation.  
282 These data therefore suggest that resolving of R-loops by expression of RNaseH1  
283 blocks histone deacetylation, therefore indicating that the presence or formation of R-  
284 loops is required for this modification to occur.

285 Similarly, we overexpressed RNaseH1 to determine whether resolving R-loops  
286 would influence the intracellular survival of *L. monocytogenes* as observed upon loss  
287 of SIRT2 or TDP-43 (Fig. 3B). In agreement with results from Figure 3B, cells  
288 transfected with a control mCherry plasmid behave as untransfected cells. By  
289 comparison, overexpression of RNaseH1 is alone sufficient to cause the same  
290 decrease in recovered bacterial colonies 24h post infection with no impact on infection  
291 at 6h (Fig. 4B and S5). Interestingly, additional SIRT2 inhibition with AGK2 does not  
292 have a cumulative effect on intracellular bacterial numbers, suggesting that R-loops  
293 are required for SIRT2 to promote infection (Fig. 4B). Together these data establish  
294 that R-loops are required for SIRT2 activity during infection, and that blocking their  
295 formation is alone sufficient to negatively affect the long-term survival of *L.*  
296 *monocytogenes* in host cells, phenotypically copying the loss of SIRT2 and TDP-43.

297

298 **TDP-43 and R-loops are required to protect against excessive infection induced**  
299 **DNA damage**

300 Our data shows that SIRT2 activity and H3K18 deacetylation reduce the  
301 genotoxic effects of *L. monocytogenes* infection. We therefore asked whether TDP-43  
302 and R-loops, which are also required for infection induced H3K18 deacetylation, would  
303 impact the accumulation of DNA damage. At earlier timepoints, where no infection-  
304 induced  $\gamma$ H2AX is observed, loss of either SIRT2 or TDP-43 does not result in  
305 heightened  $\gamma$ H2AX in cells (Fig. 5A). Consistent with our results using AGK2, infected  
306 cells depleted of SIRT2 or TDP-43 by RNAi display significantly elevated levels of  
307  $\gamma$ H2AX in infected cells, as detected by western blot at 24 hours post infection (Fig.  
308 5B). Likewise, blocking the formation of R-loops by overexpressing RNaseH1 also  
309 significantly increases amount of  $\gamma$ H2AX detected in infected cells at 24 hours post  
310 infection (Fig. 5C). This is in accordance with the role of R-loops in H3K18  
311 deacetylation, demonstrating that R-loop inhibition phenotypically copies the loss of  
312 SIRT2 or TDP-43. Therefore, R-loops are required to protect infected cells from  
313 excessive DNA damage and are important for a productive *L. monocytogenes*  
314 infection.

315

316 **DISCUSSION**

317 Over the last decade, host nuclear factors and processes have been identified  
318 as common targets for bacterial pathogen manipulation during infection (Bierne &  
319 Hamon, 2020; Eldridge *et al*, 2020a; Dong & Hamon, 2020). Previous work  
320 demonstrated that, through InIB-induced signalling, *L. monocytogenes* triggers  
321 dephosphorylation of SIRT2 and co-opts its activity resulting in H3K18 deacetylation  
322 and augmented infection. In this study we decipher how SIRT2 interacts with chromatin  
323 upon infection and how its hijacking by *L. monocytogenes* contributes to bacterial  
324 infection. Here, we establish that SIRT2 activity towards H3K18-ac is required to  
325 maintain host cell health during infection, as in its absence host cell viability is reduced,  
326 resulting in a decrease in bacterial numbers. Specifically, SIRT2 activity and H3K18  
327 deacetylation serve to protect host cell genome integrity by limiting the accumulation  
328 of DNA damage induced by *L. monocytogenes*. Mechanistically, infection and S25  
329 dephosphorylation of SIRT2 enhance its interaction with the nucleic binding protein  
330 TDP-43 which enriches SIRT2 at the TSSs of specific genes to permit H3K18

331 deacetylation and maintain genome stability. These protective effects are also  
332 dependent on chromosomal DNA:RNA hybrids called R-loops which likely define the  
333 genomic locality of TDP-43 and thereby SIRT2 recruitment. Together, these data  
334 uncover a molecular mechanism involving a complex of SIRT2, TDP-43 and R-loops  
335 which regulate genomic integrity during infection and are the first to show functional  
336 roles for TDP-43 and R-loops in regulating cellular responses to bacteria (Fig. 6).

337 Our study defines H3K18 deacetylation by SIRT2 as the key factor required for  
338 protection from DNA damage during infection. Following exposure to ionizing radiation,  
339 SIRT7-mediated H3K18 deacetylation similarly protects genome stability by promoting  
340 the recruitment of the DNA repair protein 53BP1 and increasing the efficiency of NHEJ  
341 repair (Vazquez *et al*, 2016). Taken together, these data suggest that H3K18  
342 deacetylation serves as a mark of DNA damage upon cellular stress for the recruitment  
343 of repair proteins. The general role of this mark in cellular stress needs to be  
344 investigated further.

345 Bacterial infection is a well-known inducer of DNA damage. However, some  
346 pathogens also target DNA damage responses in order to manipulate host cell fate,  
347 for instance to promote cell survival (Leitão *et al*, 2014; Samba-Louaka *et al*, 2014;  
348 Weitzman & Weitzman, 2014; Chumduri *et al*, 2013). *L. monocytogenes* infection has  
349 been reported to generate DNA damage in the host independently of ROS through an  
350 unknown mechanism (Samba-Louaka *et al*, 2014; Leitão *et al*, 2014). In fact, *L.*  
351 *monocytogenes* triggers degradation of the host DNA damage sensor MRE11, which  
352 promotes infection (Samba-Louaka *et al*, 2014). Previous work has suggested that this  
353 infection-induced DNA damage promotes infection by delaying host cell cycle  
354 progression and increasing the host cellular nucleotide pool which can be scavenged  
355 by bacteria, promoting their replication (Leitão *et al*, 2014). In macrophages, *L.*  
356 *monocytogenes* infection induces DNA breaks which are generated by nitric oxide  
357 production in responses to TLR signalling. This in turn activates a DNA damage  
358 response (DDR) pathway that regulates a pro-inflammatory transcriptional program to  
359 augment macrophage responses (Morales *et al*, 2017). Consistent with its potential  
360 role in DDR during infection, our previously published SIRT2 interactome identified  
361 many DNA damage sensor and repair proteins including KU70/ KU80, RPA1, FEN1  
362 and PARP1 (Eldridge *et al*, 2020b). Irrespective of the role that DNA damage might  
363 play during infection, mitigating its cytotoxic effects would benefit the maintenance of  
364 the intracellular niche.

365

366           The exploitation of SIRT2 requires the effector InlB which binds and activates  
367 the host receptor for hepatocyte growth factor (HGF) c-Met (Eskandarian *et al*, 2013).  
368 Classically this interaction is recognised to induce the uptake of *L. monocytogenes* into  
369 non-phagocytic cells by clathrin-mediated endocytosis and trigger host pro-survival  
370 signalling through PI3K and AKT which are also typical of HGF stimulation to promote  
371 infection (Radoshevich & Cossart, 2018). In non-infectious pathologies such as cancer  
372 the HGF/c-Met axis is often hyperactive which greatly contributes to oncogenesis by  
373 promoting cancer cells survival. Additionally, constitutive c-Met signalling in cancer  
374 cells also stimulates multiple DNA repair mechanisms which can render tumours  
375 resistant to anti-cancer drugs which act by inducing DNA damage (Medová *et al*, 2014;  
376 Comoglio *et al*, 2018; De Bacco *et al*, 2016; Li *et al*, 2009). Interestingly, mutant  $\Delta$ *inlB*  
377 *L. monocytogenes* induce higher levels of host DNA damage during infection despite  
378 being less invasive (Samba-Louaka *et al*, 2014). As such, the engagement of c-Met,  
379 hijacking of SIRT2, and subsequent H3K18 deacetylation, could represent a specific  
380 DDR mechanism which is exploited by *L. monocytogenes* to promote host cell survival.

381           TDP-43 is a ubiquitously expressed protein belonging to the heterogenous  
382 nuclear ribonucleoprotein (hnRNP) family which has specificity for single stranded  
383 TG/UG-rich DNA and RNA (Kitamura *et al*, 2018; Kuo *et al*, 2014; Buratti *et al*, 2004;  
384 Buratti & Baralle, 2001). Like SIRT2, TDP-43 also shuttles between the cytoplasm and  
385 nucleus (Ayala *et al*, 2008), however, it primarily maintains a nuclear localisation and  
386 functions in RNA processing and as a direct transcriptional repressor (Lagier-Tourenne  
387 *et al*, 2010; Lalmansingh *et al*, 2011). Though primarily monomeric physiological  
388 oligomerisation of TDP-43 has also been described and is believed to regulate DNA-  
389 binding and stress resistance (Chang *et al*, 2012; Afroz *et al*, 2017). TDP-43 has been  
390 identified as a causative factor of the neurodegenerative disease amyotrophic lateral  
391 sclerosis (ALS), mostly commonly due to mutations which cause it to mislocalise to the  
392 cytoplasm and self-assemble into large prion-like aggregates (Jo *et al*, 2020). As well  
393 as their direct pathological roles, ALS-related mutations also disrupt the native  
394 functions of TDP-43 revealing that it acts as a scaffold for the recruitment of DNA repair  
395 proteins. As such, ALS mutant or TDP-43 deficient neuronal cells have defects in  
396 NHEJ DNA repair and are more sensitive to genotoxic agents (Mitra *et al*, 2019;  
397 Konopka *et al*, 2020). The interaction of TDP-43 with SIRT2 had not previously been

398 shown, however our work suggests that SIRT2 could have an important role in  
399 regulating DNA repair in ALS

400 R-Loops also regulate DNA damage; however, whether they are detrimental or  
401 beneficial for the maintenance of genome integrity remains controversial (Marnef &  
402 Legube, 2021; Crossley et al, 2019; Niehrs & Luke, 2020). Persistent R-loops have  
403 been demonstrated to cause DNA damage due to incorrect processing by nucleotide  
404 excision repair nucleases XPG and XPA or by blocking replication fork progression  
405 resulting in the formation double strand breaks (Gan et al, 2011; Cristini et al, 2019).  
406 However, R-loops can also function to promote DNA repair, particularly in the context  
407 of transcriptionally coupled homologous recombination repair and NHEJ (Marnef &  
408 Legube, 2021; Chakraborty et al, 2016; Yasuhara et al, 2018). We find that blocking  
409 R-loop formation by overexpressing RNaseH1 leads to higher levels host DNA damage  
410 in response to *L. monocytogenes*, suggesting that R-loops play a protective role during  
411 infection.

412 Interestingly, in silico analysis shows that many SIRT2 regulated sequences  
413 contain or are predicted to contain R-loops; additionally there are multiple studies  
414 which demonstrate that TDP-43 localises to and interacts with R-loops (Gianini et al,  
415 2020; Mosler et al, 2021; Cristini et al, 2018). Our data suggest that, in the context of  
416 *L. monocytogenes* infection, TDP-43 recruits SIRT2 to chromatin, as it can for other  
417 DDR factors (Mitra et al, 2019; Konopka et al, 2020). Consistent with this, inhibition of  
418 H3K18 deacetylation by RNaseH1 indicates that R-loops act upstream of SIRT2  
419 activity, suggesting that R-loops are recognised by TDP-43, which serves as a platform  
420 for SIRT2 recruitment during infection.

421 Sirtuins have long been known to regulate cellular responses to DNA damage.  
422 Recent work showed that SIRT6 acts as a direct DNA damage sensor whose activity  
423 initiates DNA repair responses when localised to broken DNA. Interestingly, although  
424 SIRT2 lacks an ability to directly bind DNA, SIRT2 fused with a lactose repressor  
425 (LacR) element (to allow DNA binding) showed that recruitment of SIRT2 to DNA was  
426 sufficient to initiate the recruitment of DNA repair proteins (Onn et al, 2020). Given  
427 that SIRT2 has also been shown to promote mycobacterial infection, this interaction  
428 with TDP-43 could function during other bacterial infections (Bhaskar et al, 2020).  
429 Independently, these factors are also linked to many non-infectious human  
430 pathologies, and mutations in SIRT2, TDP-43 and R-loop regulating factors have been  
431 linked with age-related illnesses such as cancer and neurodegenerative diseases, both

432 of which are also intrinsically linked to the deregulation of DNA damage responses. As  
433 such, these mechanisms not only have implications in better understanding cellular  
434 response to infection but could also extend to other factors of human health and  
435 disease.

436

## 437 **EXPERIMENTAL PROCEDURES**

438

### 439 ***Cell Culture, inhibitor treatments and Listeria monocytogenes infections***

440 HeLa (ATCC, CCL-2) cells were grown to semi-confluency in minimum essential  
441 medium (MEM) plus GlutaMAX (Gibco) supplemented with 1 mM sodium pyruvate  
442 (Gibco), and 10% fetal bovine serum (FBS). 24 hours before infection, HeLa cell  
443 medium was changed to low serum (0.25% FBS) MEM medium containing 1 mM  
444 sodium pyruvate. *Listeria monocytogenes* EGD (see Supplementary Table S1) were  
445 grown overnight in brain heart infusion (BHI) liquid broth with shaking at 37°C. For  
446 infection bacteria were subcultured (1 in 10) into fresh BHI and grown to mid log phase  
447 ( $OD_{600} = 0.8-1$ ) and washed 3× in MEM + 0.25% FBS before being added to cells.  
448 Bacteria were then added onto cells at a MOI of 100 (unless otherwise stated) and  
449 incubated for 1 hour. Cells were then washed 3× in MEM + 0.25% FBS and incubated  
450 in fresh medium for 30 minutes prior to the addition of 10  $\mu\text{g}\cdot\text{mL}^{-1}$  gentamicin for the  
451 remaining time of the infection. Inhibitors were added 2 hours prior to infection and  
452 remained present until 1 hour post infection when cells were washed. SIRT2 inhibitor  
453 AGK2 (Calbiochem) was used at a concentration of 5 mM.

454

### 455 ***Cell viability alamar Blue assay***

456 Cells were incubated at 37°C in fresh medium containing 10% alamarBlue reagent for  
457 1-2 hours. Fluorescence (Ex/Em 560/590 nm) was then read using a Cytation 5  
458 (BioTek). Fluorescence readings were blank corrected to wells containing only culture  
459 medium and results are expressed as a percentage of uninfected cells viability.

460

### 461 ***Immunofluorescence microscopy***

462 For immunofluorescence HeLa cells were plated onto coverslips prior to  
463 treatments. Following treatments cells were washed three times in PBS and fixed using  
464 4% PFA in DPBD for 10 mins. Cells were then permeabilised for 10 mins in 0.2%  
465 Triton X-100 PBS. Coverslips were then incubated in blocking buffer (1% BSA TBS) for

466 1 hour. For immunostaining coverslips were inverted on to droplets of blocking buffer  
467 containing Phospho-Histone H2A.X (Ser139) (CST, 2577) antibody (1:500) then  
468 incubated in a humidified chamber overnight at 4°C. Subsequently, coverslips were  
469 washed 3 times in PBS + 0.1% Tween then incubated at room temperature in the dark  
470 for 1 hour in blocking buffer containing Alexa Fluor 546 goat anti-rabbit IgG (Invitrogen,  
471 A-11035) secondary antibody (1:1500) for 1 hour. Coverslips were washed three times  
472 TBS + 0.1% Tween, nuclei were stained with 300 nM (100 ng.mL<sup>-1</sup>) Hoechst 33342 for  
473 15 mins. Coverslips were then washed three times in TBS, rinsed briefly in distilled  
474 water and mounted using Fluoromount-G® Mounting Medium (INTERCHIM). All  
475 images were acquired using a Zeiss Axio Observer spinning-disk confocal microscope  
476 equipped driven by the MetaMorph software. For quantification a minimum of ten fields  
477 of view were obtained per condition of each biological replicate.

478

#### 479 ***Immunoblotting and band quantification***

480 Cell lysates were prepared in 2× Laemmli loading buffer supplemented with cOmplete  
481 protease inhibitor and PhosSTOP phosphatase inhibitor tablets (Roche), 1 mM PMSF,  
482 5 mM sodium butyrate and 5% β -mercaptoethanol. Proteins were separated by SDS-  
483 PAGE using TrisGlycine buffer systems and transferred to PVDF membranes (Bio-  
484 Rad Laboratories). Membranes were blocked for 1 hour in TBS + 0.1% Tween  
485 containing 5% milk and then incubated with primary antibodies (as per the  
486 manufactures instructions) overnight at 4°C with rocking. Immunoblot quantification  
487 used images acquired on a Chemidoc MP (Bio-Rad), analyzed using Image Lab  
488 software (Bio-Rad Laboratories).

489

#### 490 ***Antibodies***

491 Antibodies used in this study are as follow; anti-GFP antibody (Abcam, ab290), Acetyl-  
492 Histone H3 (Lys18) antibody (CST, 9675), anti-Histone H3 antibody (Abcam,  
493 ab1791), anti-β-actin (Sigma, AC-15), anti-TDP-43 antibody (Sigma, T1705), anti-  
494 SIRT2 (CST, 12650) anti-mCherry antibody (1C51) (Novus Biologicals, NBP1-96752),  
495 anti-γH2A.X (S139) antibody (2OE3) (CST, 9718S), anti-H2A.X antibody (CST,  
496 2595S), Phospho-Histone H2A.X (Ser139) antibody (immunofluorescence) (CST,  
497 2577).

498

#### 499 ***In vivo animal studies***

500 Protocols for animal studies were reviewed and approved by the Comité d’Ethique pour  
501 l’Expérimentation Animale of Institut Pasteur under approval number Dap170005 and  
502 performed in accordance with national laws and institutional guidelines for animal care  
503 and use. Wild-type C57BL/6 mice were purchased from Janvier  
504 Labs. *Sirt2*<sup>tm1a(EUCOMM)Wtsi</sup> mice were obtained from the Sanger Center. For details, see  
505 [www.informatics.jax.org/javawi2/servlet/WIFetch?page=alleleDetail&key=606707](http://www.informatics.jax.org/javawi2/servlet/WIFetch?page=alleleDetail&key=606707).  
506 Female mice aged 8–16 weeks old were infected by intravenous injection of 10<sup>5</sup>  
507 bacteria per animal and proceeded for 72 hours.

508

### 509 ***RNA interference and DNA transfections***

510 Transient RNAi was carried out using ON-TARGETplus siRNAs from  
511 Dharmacon. HeLa cells were transfected with siRNA targeting either *SIRT2*  
512 (SMARTpool L-004826-00-0005), or *TARDBP* (SMARTpool L-012394-00-0005). ON-  
513 TARGETplus Non-targeting Pool siRNA (D-001810-10-05) served as the negative  
514 control. Reverse transfections were performed in 6 well plates using Lipofectamine  
515 RNAiMAX reagent (Invitrogen). Briefly, 2.5x10<sup>5</sup> HeLa were added to wells containing  
516 15 pmol of siRNA mixed with 3 µL Lipofectamine RNAiMAX in 500 µL OptiMEM (Gibco)  
517 and incubated for 48 hours prior to further treatment or infection.

518 Transient expression of DNA plasmids was carried out in 6 well plates by  
519 reverse transfection using Lipofectamine LTX (Invitrogen). Briefly, 5-6x10<sup>5</sup> HeLa cells  
520 were added to wells containing DNA-lipid complexes consisting of 1 µg plasmid DNA  
521 mixed with 1.5 µL Plus reagent and 3 µL LTX transfection reagent in 500 µL OptiMEM.

522

### 523 ***RNaseH1 transfection and induction***

524 For experiments testing the role RNaseH1 overexpression HeLa stably express the  
525 tetracycline repressor (HeLa T-Rex) protein (Agathe Subtil) were used to enable  
526 induction of pICE plasmids. HeLa T-Rex cells were transfected as described above.  
527 For plasmid induction transfected cells were incubated overnight with 10 ng.mL<sup>-1</sup>  
528 Anhydrotetracycline hydrochloride (AHT).

529

### 530 ***Co-immunoprecipitation with MNase lysis***

531 Immunoprecipitations of SIRT2-GFP were performed using GFP-Trap®  
532 agarose beads (Chromotek). Briefly, 2-4x10<sup>6</sup> HeLa cells were transfected with tagged-  
533 SIRT2 or empty pEGFP-N1/pmCherry-C1. 24 hours post transfection cells were



534 collected using PBS+EDTA washed once in PBS and resuspended in 100uL MNase  
535 reaction buffer (1mM CaCl<sub>2</sub>, 0.2% NP-40, 50mM Tris-HCl (pH 7.6) 1mM CaCl<sub>2</sub>, 0.2%  
536 NP-40, 50mM Tris-HCl (pH 7.6) and 10 U micrococcal nuclease to react at 37 °C for  
537 20 min. Reaction was terminated with 5 mM EDTA and sample was diluted 1:1 with 2X  
538 RIPA buffer containing 1 mM PMSF and sodium butyrate and incubated on ice for 10  
539 minutes. Lysate was cleared by centrifugation at 20000 *xg* for 5 minutes and the  
540 resulting supernatant was diluted with 600 µL of wash/dilution buffer (10 mM Tris/Cl  
541 pH 7.5; 150 mM NaCl; 0.5 mM EDTA). 40 µL was removed for input and the remaining  
542 lysate was incubated with GFP-Trap® agarose beads at 4°C with agitation for 1 hour.  
543 The beads were washed twice in wash buffer and once in wash buffer containing 300  
544 mM NaCl. Proteins were eluted by boiling beads in 50 µL 2x Laemmli buffer with 5%  
545 β-mercaptoethanol.

546

#### 547 ***Chromatin immunoprecipitation PCR***

548 3-5x10<sup>6</sup> cells were cross-linked at room temperature with 1% formaldehyde for  
549 10 minutes followed by quenching with 130 mM glycine for 5 minutes. Chromatin  
550 extraction and ChIP-PCR were performed as previously described with slight  
551 modifications (Connor *et al*, 2021). Briefly, cell pellets were lysed on ice in nuclear  
552 isolation buffer (NIB) supplemented with 0.2% Triton X-100 and inhibitors (1x  
553 cOmplete™ protease, 1X PhosSTOP™, 10 mM sodium butyrate, 0.2mM PMSF) for  
554 30 min with gentle pipetting every 10 min. Nuclei were collected by centrifugation and  
555 re-suspended in chromatin shearing buffer with inhibitors. Chromatin was fragmented  
556 by sonication (30 cycles of 15 s 'on' and 30 s 'off') with a Bioruptor (Diagenode) to 200  
557 – 1000 bp. Sheared chromatin was cleared by centrifugation, sampled for size using  
558 2% agarose gel electrophoresis and quantified using Pico488 (Lumiprobe, 42010). 2  
559 µg of antibody (anti-TDP-43, T1705; anti-GFP antibody, ab290) was used per ChIP  
560 and were bound to Dynabeads Protein G (Invitrogen) overnight at 4°C with gentle  
561 rotation. Chromatin was diluted to 10-15 µg/IP with SDS dilution buffer supplemented  
562 with inhibitors. 8% of ChIP sample volume was reserved to serve as input. Diluted  
563 chromatin was then added to antibody bound Dynabeads and incubated at 4°C  
564 overnight with gentle rotation. IP samples were washed sequentially with 1 mL of  
565 buffers 1–6. Water containing 10% Chelex was added to washed beads and input  
566 samples and were eluted and de-crosslinked by boiling for 10 minutes. Samples were  
567 then treated with RNase A at room temperature for 10 minutes at 37°C followed by

568 proteinase K (500 µg/ml) for 20 min at 55°C. Samples were then boiled for a further 10  
569 min and recovered DNA was purified by phenol–chloroform extraction and isopropanol  
570 precipitation and resuspended in molecular grade water. CHIP DNA was quantified by  
571 qRT-PCR using iTaq™ Universal SYBR® Green Supermix and results were  
572 expressed as percent recovery from input calculated as 2 raised to cycle adjusted input  
573 sample quantitation cycle (Cq) value minus the Cq immunoprecipitation sample,  
574 multiplied by 100. For buffer formulations and primer sequences see Supplementary  
575 Tables S2 and S3 respectively.

576

### 577 **RNA isolation, reverse transcription, and qRT-PCR**

578 RNA was extracted from cells using TRIzol™ Reagent (Life Technologies) extraction  
579 method as per the manufacturer's instructions. cDNA was synthesised from 2 µg  
580 purified RNA using iScript™ cDNA Synthesis Kit (Bio-Rad) and quantified by qRT-PCR  
581 using iTaq™ Universal SYBR® Green Supermix. Data was analysed using  $\Delta$ CT  
582 method relative to *GAPDH*.

583

### 584 **Plasmids Single, oligo mutagenesis and molecular cloning**

585 Routine cloning was carried out by sequence- and ligation-independent cloning  
586 (SLIC) (Jeong *et al*, 2012) for primers see Supplementary Table S3. For further details  
587 on plasmids used in this study see Supplementary Table S4. pEGFP-H3 WT, pEGFP-  
588 H3 K18A, pEGFP-H3 K18Q were a gift from Dr Fang-Lin Sun (Liu *et al*, 2012).  
589 pmCherry TDP-43 was cloned from TDP43 NOTAG1(Addgene #28206) which was a  
590 gift from Zuoshang Xu (Yang *et al*, 2010). pICE-NLS-mCherry (Addgene #60364) and  
591 pICE-RNaseHI-WT-NLS-mCherry (Addgene #60365) were gifts from Patrick Calsou  
592 (Britton *et al*, 2014). pICE-RNaseHI-WT-NLS-mCherry (Dead) was made by  
593 introducing inactivating D10R and E48R mutations by single oligo mutagenesis  
594 (Shenoy & Visweswariah, 2003).

595

### 596 **Statistical analysis**

597 All experiments were repeated at least twice, and statistical tests are reported  
598 in the figure legends. Data normality was tested by Shapiro-Wilk test, and appropriate  
599 parametric or non-parametric tests were used. Data plots and statistics were generated  
600 using Prism (version 9, GraphPad Software Inc.).

601

## 602 **ACKNOWLEDGEMENTS**

603 We would like to thank and acknowledge Pascale Cossart for her support during the  
604 project and her contribution towards the acquisition of financial support. We also thank  
605 Michael G. Connor for his help processing samples for CHIP-PCR, Marie-Anne Nahori  
606 for performing mouse infections and Tiphaine Marie-Noelle Camarasa for help  
607 processing mouse organs. We thank Julia Sanchez-Garrido, Pascale Cossart, Julia  
608 Torne Cortada and Tiphaine Marie-Noelle for critical reading of the manuscript. MJGE  
609 is supported by a fellowship from the French Government's Investissement d'Avenir  
610 program, the Laboratoire d'Excellence "Integrative Biology of Emerging Infectious  
611 Diseases" (ANR-10-LABX-62-IBEID). Work in the M.A.H. laboratory received financial  
612 support from the Institut Pasteur, the National Research Agency (ANR-EPIBACTIN),  
613 the Fondation pour la Recherche Médicale (FRM), the Fondation iXCore-iXLife and  
614 the Pasteur-Weizmann research fund.

615

## 616 **COMPETING INTERESTS**

617 The authors declare that they have no conflicts of interest with the contents of this  
618 article.

619

## 620 **AUTHOR CONTRIBUTIONS**

621 M.J.G.E., and M.A.H. conceived and designed the experiments. M.J.G.E. conducted  
622 the experiments. M.J.G.E. analysed results. M.J.G.E. wrote the original manuscript  
623 draft. M.J.G.E. and M.A.H. edited and reviewed the manuscript. M.A.H. supervised  
624 the research and obtained funding. All authors approved the final manuscript.

625

## 626 **REFERENCES**

627 Afroz T, Hock E-M, Ernst P, Foglieni C, Jambeau M, Gilhespy LAB, Laferriere F,  
628 Maniecka Z, Plückthun A, Mittl P, *et al* (2017) Functional and dynamic  
629 polymerization of the ALS-linked protein TDP-43 antagonizes its pathologic  
630 aggregation. *Nat Commun* 2017 8: 1–15  
631 Ashida H, Mimuro H, Ogawa M, Kobayashi T, Sanada T, Kim M & Sasakawa C  
632 (2011) Cell death and infection: A double-edged sword for host and pathogen

- 633 survival. *J Cell Biol* 195: 931–942
- 634 Ayala YM, Zago P, D'Ambrogio A, Xu Y-F, Petrucelli L, Buratti E & Baralle FE (2008)
- 635 Structural determinants of the cellular localization and shuttling of TDP-43. *J Cell*
- 636 *Sci* 121: 3778–3785
- 637 De Bacco F, D'Ambrosio A, Casanova E, Orzan F, Neggia R, Albano R, Verginelli F,
- 638 Cominelli M, Poliani PL, Luraghi P, *et al* (2016) MET inhibition overcomes
- 639 radiation resistance of glioblastoma stem-like cells. *EMBO Mol Med* 8: 550–568
- 640 Behar SM & Briken V (2019) Apoptosis inhibition by intracellular bacteria and its
- 641 consequence on host immunity. *Curr Opin Immunol* 60: 103–110
- 642 Bhaskar A, Kumar S, Khan MZ, Singh A, Dwivedi VP & Nandicoori VK (2020) Host
- 643 sirtuin 2 as an immunotherapeutic target against tuberculosis. *Elife* 9: 1–28
- 644 Bierne H & Hamon M (2020) Targeting host epigenetic machinery: The Listeria
- 645 paradigm. *Cell Microbiol* 22: e13169
- 646 Black JC, Mosley A, Kitada T, Washburn M & Carey M (2008) The SIRT2
- 647 Deacetylase Regulates Autoacetylation of p300. *Mol Cell* 32: 449–455
- 648 Bosch-Presegué L & Vaquero A (2014) Sirtuins in stress response: Guardians of the
- 649 genome. *Oncogene* 33: 3764–3775
- 650 Britton S, Dernoncourt E, Delteil C, Froment C, Schiltz O, Salles B, Frit P & Calsou P
- 651 (2014) DNA damage triggers SAF-A and RNA biogenesis factors exclusion from
- 652 chromatin coupled to R-loops removal. *Nucleic Acids Res* 42: 9047–9062
- 653 Buratti E & Baralle FE (2001) Characterization and Functional Implications of the
- 654 RNA Binding Properties of Nuclear Factor TDP-43, a Novel Splicing Regulator of
- 655 CFTR Exon 9. *J Biol Chem* 276: 36337–36343
- 656 Buratti E, Brindisi A, Pagani F & Baralle FE (2004) Nuclear factor TDP-43 binds to
- 657 the polymorphic TG repeats in CFTR intron 8 and causes skipping of exon 9: A
- 658 functional link with disease penetrance. *Am J Hum Genet* 74: 1322–1325
- 659 Chakraborty A, Tapryal N, Venkova T, Horikoshi N, Pandita RK, Sarker AH, Sarker
- 660 PS, Pandita TK & Hazra TK (2016) Classical non-homologous end-joining
- 661 pathway utilizes nascent RNA for error-free double-strand break repair of
- 662 transcribed genes. *Nat Commun* 7: 1–12
- 663 Chang C ke, Wu TH, Wu CY, Chiang M hui, Toh EKW, Hsu YC, Lin KF, Liao Y heng,
- 664 Huang T huang & Huang JJT (2012) The N-terminus of TDP-43 promotes its
- 665 oligomerization and enhances DNA binding affinity. *Biochem Biophys Res*
- 666 *Commun* 425: 219–224

- 667 Chen L, Huang S, Lee L, Davalos A, Schiestl RH, Campisi J & Oshima J (2003)  
668 WRN, the protein deficient in Werner syndrome, plays a critical structural role in  
669 optimizing DNA repair. *Aging Cell* 2: 191–199
- 670 Cheng Y, Ren X, Gowda ASP, Shan Y, Zhang L, Yuan YS, Patel R, Wu H, Huber-  
671 Keener K, Yang JW, *et al* (2013) Interaction of Sirt3 with OGG1 contributes to  
672 repair of mitochondrial DNA and protects from apoptotic cell death under  
673 oxidative stress. *Cell Death Dis* 4: e731–e731
- 674 Chumduri C, Gurumurthy RK, Zadora PK, Mi Y & Meyer TF (2013) Chlamydia  
675 Infection Promotes Host DNA Damage and Proliferation but Impairs the DNA  
676 Damage Response. *Cell Host Microbe* 13: 746–758
- 677 Comoglio PM, Trusolino L & Boccaccio C (2018) Known and novel roles of the MET  
678 oncogene in cancer: A coherent approach to targeted therapy. *Nat Rev Cancer*  
679 18: 341–358
- 680 Connor MG, Camarasa TMN, Patey E, Rasid O, Barrio L, Weight CM, Miller DP,  
681 Heyderman RS, Lamont RJ, Enninga J, *et al* (2021) The histone demethylase  
682 KDM6B fine-tunes the host response to *Streptococcus pneumoniae*. *Nat*  
683 *Microbiol* 6: 257–269
- 684 Cristini A, Groh M, Kristiansen MS & Gromak N (2018) RNA/DNA Hybrid Interactome  
685 Identifies DXH9 as a Molecular Player in Transcriptional Termination and R-  
686 Loop-Associated DNA Damage. *Cell Rep* 23: 1891–1905
- 687 Cristini A, Ricci G, Britton S, Salimbeni S, Huang S yin N, Marinello J, Calsou P,  
688 Pommier Y, Favre G, Capranico G, *et al* (2019) Dual Processing of R-Loops and  
689 Topoisomerase I Induces Transcription-Dependent DNA Double-Strand Breaks.  
690 *Cell Rep* 28: 3167-3181.e6
- 691 Crossley MP, Bocek M & Cimprich KA (2019) R-Loops as Cellular Regulators and  
692 Genomic Threats. *Mol Cell* 73: 398–411
- 693 Davis CA, Hitz BC, Sloan CA, Chan ET, Davidson JM, Gabdank I, Hilton JA, Jain K,  
694 Baymuradov UK, Narayanan AK, *et al* (2018) The Encyclopedia of DNA  
695 elements (ENCODE): data portal update. *Nucleic Acids Res* 46: D794–D801
- 696 Dong W & Hamon MA (2020) Revealing eukaryotic histone-modifying mechanisms  
697 through bacterial infection. *Semin Immunopathol* 2020 422 42: 201–213
- 698 Eldridge MJG, Cossart P & Hamon MA (2020a) Pathogenic Biohacking: Induction,  
699 Modulation and Subversion of Host Transcriptional Responses by *Listeria*  
700 monocytogenes. *Toxins* 2020, Vol 12, Page 294 12: 294

- 701 Eldridge MJG, Pereira JM, Impens F & Hamon MA (2020b) Active nuclear import of  
702 the deacetylase Sirtuin-2 is controlled by its C-terminus and importins. *Sci Rep*  
703 10: 1–12
- 704 Eskandarian HA, Impens F, Nahori M-A, Soubigou G, Coppée J-Y, Cossart P &  
705 Hamon MA (2013) A Role for SIRT2-Dependent Histone H3K18 Deacetylation in  
706 Bacterial Infection. *Science (80- )* 341: 1238858
- 707 Fan W & Luo J (2010) SIRT1 regulates UV-induced DNA repair through  
708 deacetylating XPA. *Mol Cell* 39: 247–258
- 709 Friedrich A, Pechstein J, Berens C & Lührmann A (2017) Modulation of host cell  
710 apoptotic pathways by intracellular pathogens. *Curr Opin Microbiol* 35: 88–99
- 711 Gan W, Guan Z, Liu J, Gui T, Shen K, Manley JL & Li X (2011) R-loop-mediated  
712 genomic instability is caused by impairment of replication fork progression.  
713 *Genes Dev* 25: 2041–2056
- 714 Gianini M, Bayona-Feliu A, Sproviero D, Barroso SI, Cereda C & Aguilera A (2020)  
715 TDP-43 mutations link Amyotrophic Lateral Sclerosis with R-loop homeostasis  
716 and R loopmediated DNA damage. *PLoS Genet* 16: e1009260
- 717 Gomes P, Fleming Outeiro T & Cavadas C (2015) Emerging Role of Sirtuin 2 in the  
718 Regulation of Mammalian Metabolism. *Trends Pharmacol Sci* 36: 756–768
- 719 Houtkooper RH, Pirinen E & Auwerx J (2012) Sirtuins as regulators of metabolism  
720 and healthspan. *Nat Rev Mol Cell Biol* 13: 225–238
- 721 Inoue T, Hiratsuka M, Osaki M, Yamada H, Kishimoto I, Yamaguchi S, Nakano S,  
722 Katoh M, Ito H & Oshimura M (2007) SIRT2, a tubulin deacetylase, acts to block  
723 the entry to chromosome condensation in response to mitotic stress. *Oncogene*  
724 26: 945–957
- 725 Jeong J-Y, Yim H-S, Ryu J-Y, Lee HS, Lee J-H, Seen D-S & Kang SG (2012) One-  
726 step sequence- and ligation-independent cloning as a rapid and versatile cloning  
727 method for functional genomics studies. *Appl Environ Microbiol* 78: 5440–3
- 728 Jeong J, Juhn K, Lee H, Kim SH, Min BH, Lee KM, Cho MH, Park GH & Lee KH  
729 (2007) SIRT1 promotes DNA repair activity and deacetylation of Ku70. *Exp Mol*  
730 *Med* 39: 8–13
- 731 Jeong SM, Xiao C, Finley LWS, Lahusen T, Souza AL, Pierce K, Li YH, Wang X,  
732 Laurent G, German NJ, *et al* (2013) SIRT4 has tumor-suppressive activity and  
733 regulates the cellular metabolic response to dna damage by inhibiting  
734 mitochondrial glutamine metabolism. *Cancer Cell* 23: 450–463

- 735 Jo M, Lee S, Jeon YM, Kim S, Kwon Y & Kim HJ (2020) The role of TDP-43  
736 propagation in neurodegenerative diseases: integrating insights from clinical and  
737 experimental studies. *Exp Mol Med* 52: 1652–1662
- 738 Kim HS, Patel K, Muldoon-Jacobs K, Bisht KS, Aykin-Burns N, Pennington JD, van  
739 der Meer R, Nguyen P, Savage J, Owens KM, *et al* (2010) SIRT3 Is a  
740 Mitochondria-Localized Tumor Suppressor Required for Maintenance of  
741 Mitochondrial Integrity and Metabolism during Stress. *Cancer Cell* 17: 41–52
- 742 Kim HS, Vassilopoulos A, Wang RH, Lahusen T, Xiao Z, Xu X, Li C, Veenstra TD, Li  
743 B, Yu H, *et al* (2011) SIRT2 Maintains Genome Integrity and Suppresses  
744 Tumorigenesis through Regulating APC/C Activity. *Cancer Cell* 20: 487–499
- 745 Kitamura A, Shibasaki A, Takeda K, Suno R & Kinjo M (2018) Analysis of the  
746 substrate recognition state of TDP-43 to single-stranded DNA using  
747 fluorescence correlation spectroscopy. *Biochem Biophys Reports* 14: 58–63
- 748 Knodler LA, Finlay B & Steele-Mortimer O (2005) The Salmonella effector protein  
749 SopB protects epithelial cells from apoptosis by sustained activation of Akt. *J*  
750 *Biol Chem* 280: 9058–9064
- 751 Konopka A, Whelan DR, Jamali MS, Perri E, Shahheydari H, Toth RP, Parakh S,  
752 Robinson T, Cheong A, Mehta P, *et al* (2020) Impaired NHEJ repair in  
753 amyotrophic lateral sclerosis is associated with TDP-43 mutations. *Mol*  
754 *Neurodegener* 15: 1–28
- 755 Kuo PH, Chiang CH, Wang YT, Doudeva LG & Yuan HS (2014) The crystal structure  
756 of TDP-43 RRM1-DNA complex reveals the specific recognition for UG- and TG-  
757 rich nucleic acids. *Nucleic Acids Res* 42: 4712–4722
- 758 Lagier-Tourenne C, Polymenidou M & Cleveland DW (2010) TDP-43 and FUS/TLS:  
759 Emerging roles in RNA processing and neurodegeneration. *Hum Mol Genet* 19:  
760 46–64
- 761 Lalmansingh AS, Urekar CJ & Reddi PP (2011) TDP-43 is a transcriptional  
762 repressor: The testis-specific mouse *acr1* gene is a TDP-43 target in vivo. *J*  
763 *Biol Chem* 286: 10970–10982
- 764 Leitão E, Costa AC, Brito C, Costa L, Pombinho R, Cabanes D & Sousa S (2014)  
765 *Listeria monocytogenes* induces host DNA damage and delays the host cell  
766 cycle to promote infection. *Cell Cycle* 13: 928–940
- 767 Lemos V, de Oliveira RM, Naia L, Szegő É, Ramos E, Pinho S, Magro F, Cavadas C,  
768 Rego AC, Costa V, *et al* (2017) The NAD<sup>+</sup>-dependent deacetylase SIRT2

- 769 attenuates oxidative stress and mitochondrial dysfunction and improves insulin  
770 sensitivity in hepatocytes. *Hum Mol Genet* 26: 4105–4117
- 771 Li HF, Kim JS & Waldman T (2009) Radiation-induced Akt activation modulates  
772 radioresistance in human glioblastoma cells. *Radiat Oncol* 4: 43
- 773 Liu Y, Wang DL, Chen S, Zhao L & Sun FL (2012) Oncogene  
774 Ras/phosphatidylinositol 3-kinase signaling targets histone H3 acetylation at  
775 lysine 56. *J Biol Chem* 287: 41469–41480
- 776 Marnef A & Legube G (2021) R-loops as Janus-faced modulators of DNA repair. *Nat*  
777 *Cell Biol* 23: 305–313
- 778 Medová M, Aebbersold DM & Zimmer Y (2014) The molecular crosstalk between the  
779 MET receptor tyrosine kinase and the DNA damage response-biological and  
780 clinical aspects. *Cancers (Basel)* 6: 1–27
- 781 Mitra J, Guerrero EN, Hegde PM, Liachko NF, Wang H, Vasquez V, Gao J, Pandey  
782 A, Paul Taylor J, Kraemer BC, *et al* (2019) Motor neuron disease-associated  
783 loss of nuclear TDP-43 is linked to DNA double-strand break repair defects. *Proc*  
784 *Natl Acad Sci U S A* 116: 4696–4705
- 785 Morales AJ, Carrero JA, Hung PJ, Tubbs AT, Andrews JM, Edelson BT, Calderon B,  
786 Innes CL, Paules RS, Payton JE, *et al* (2017) A type I IFN-dependent DNA  
787 damage response regulates the genetic program and inflammasome activation  
788 in macrophages. *Elife* 6
- 789 Mosler T, Conte F, Mikicic I, Kreim N, Möckel MM, Flach J, Luke B & Beli P (2021) R-  
790 loop proximity proteomics identifies a role of DDX41 in transcription-1 associated  
791 genomic instability
- 792 Niehrs C & Luke B (2020) Regulatory R-loops as facilitators of gene expression and  
793 genome stability. *Nat Rev Mol Cell Biol*
- 794 North BJ & Verdin E (2007) Interphase Nucleo-Cytoplasmic Shuttling and  
795 Localization of SIRT2 during Mitosis. *PLoS One* 2: e784
- 796 de Oliveira RM, Sarkander J, Kazantsev AG & Outeiro TF (2012) SIRT2 as a  
797 Therapeutic Target for Age-Related Disorders. *Front Pharmacol* 3: 82
- 798 Onn L, Portillo M, Illic S, Cleitman G, Stein D, Kaluski S, Shirat I, Slobodnik Z, Einav  
799 M, Erdel F, *et al* (2020) SIRT6 is a DNA double-strand break sensor. *Elife* 9
- 800 Peck B, Chen C-Y, Ho K-K, Di Fruscia P, Myatt SS, Coombes RC, Fuchter MJ, Hsiao  
801 C-D & Lam EW-F (2010) SIRT inhibitors induce cell death and p53 acetylation  
802 through targeting both SIRT1 and SIRT2. *Mol Cancer Ther* 9: 844–55



- 803 Pereira JM, Chevalier C, Chaze T, Gianetto Q, Impens F, Matondo M, Cossart P &  
804 Hamon MA (2018) Infection Reveals a Modification of SIRT2 Critical for  
805 Chromatin Association. *Cell Rep* 23: 1124–1137
- 806 Pirbhai M, Dong F, Zhong Y, Pan KZ & Zhong G (2006) The Secreted Protease  
807 Factor CPAF Is Responsible for Degrading Pro-apoptotic BH3-only Proteins in  
808 *Chlamydia trachomatis*-infected Cells. *J Biol Chem* 281: 31495–31501
- 809 Radoshevich L & Cossart P (2018) *Listeria monocytogenes*: Towards a complete  
810 picture of its physiology and pathogenesis. *Nat Rev Microbiol* 16: 32–46
- 811 Samba-Louaka A, Pereira JM, Nahori MA, Villiers V, Deriano L, Hamon MA &  
812 Cossart P (2014) *Listeria monocytogenes* Dampens the DNA Damage  
813 Response. *PLoS Pathog* 10: 1004470
- 814 Serrano L, Martínez-Redondo P, Marazuela-Duque A, Vazquez BN, Dooley SJ, Voigt  
815 P, Beck DB, Kane-Goldsmith N, Tong Q, Rabanal RM, *et al* (2013) The tumor  
816 suppressor SirT2 regulates cell cycle progression and genome stability by  
817 modulating the mitotic deposition of H4K20 methylation. *Genes Dev* 27: 639–  
818 653
- 819 Shenoy AR & Visweswariah SS (2003) Site-directed mutagenesis using a single  
820 mutagenic oligonucleotide and DpnI digestion of template DNA. *Anal Biochem*  
821 319: 335–336
- 822 Tanno M, Sakamoto J, Miura T, Shimamoto K & Horio Y (2007) Nucleocytoplasmic  
823 shuttling of the NAD<sup>+</sup>-dependent histone deacetylase SIRT1. *J Biol Chem* 282:  
824 6823–32
- 825 Tasselli L, Xi Y, Zheng W, Tennen RI, Odrowaz Z, Simeoni F, Li W & Chua KF  
826 (2016) SIRT6 deacetylates H3K18ac at pericentric chromatin to prevent mitotic  
827 errors and cellular senescence. *Nat Struct Mol Biol* 23: 434–440
- 828 Vaquero A, Scher MB, Dong HL, Sutton A, Cheng HL, Alt FW, Serrano L, Sternglanz  
829 R & Reinberg D (2006) SirT2 is a histone deacetylase with preference for  
830 histone H4 Lys 16 during mitosis. *Genes Dev* 20: 1256–1261
- 831 Vazquez BN, Thackray JK, Simonet NG, Kane-Goldsmith N, Martinez-Redondo P,  
832 Nguyen T, Bunting S, Vaquero A, Tischfield JA & Serrano L (2016) SIRT 7  
833 promotes genome integrity and modulates non-homologous end joining DNA  
834 repair. *EMBO J* 35: 1488–1503
- 835 Wang RH, Sengupta K, Li C, Kim HS, Cao L, Xiao C, Kim S, Xu X, Zheng Y, Chilton  
836 B, *et al* (2008) Impaired DNA Damage Response, Genome Instability, and

837 Tumorigenesis in SIRT1 Mutant Mice. *Cancer Cell* 14: 312–323

838 Weitzman MD & Weitzman JB (2014) What's the Damage? The Impact of Pathogens  
839 on Pathways that Maintain Host Genome Integrity. *Cell Host Microbe* 15: 283–  
840 294

841 Yan F, Cao H, Chaturvedi R, Krishna U, Hobbs SS, Dempsey PJ, Peek RM, Cover  
842 TL, Washington MK, Wilson KT, *et al* (2009) Epidermal Growth Factor Receptor  
843 Activation Protects Gastric Epithelial Cells From Helicobacter pylori-Induced  
844 Apoptosis. *Gastroenterology* 136: 1297-1307.e3

845 Yang C, Tan W, Whittle C, Qiu L, Cao L, Akbarian S & Xu Z (2010) The C-terminal  
846 TDP-43 fragments have a high aggregation propensity and harm neurons by a  
847 dominant-negative mechanism. *PLoS One* 5: e15878

848 Yasuhara T, Kato R, Hagiwara Y, Shiotani B, Yamauchi M, Nakada S, Shibata A &  
849 Miyagawa K (2018) Human Rad52 Promotes XPG-Mediated R-loop Processing  
850 to Initiate Transcription-Associated Homologous Recombination Repair. *Cell*  
851 175: 558-570.e11

852 Zhang H, Park SH, Pantazides BG, Karpiuk O, Warren MD, Hardy CW, Duong DM,  
853 Park SJ, Kim HS, Vassilopoulos A, *et al* (2013) SIRT2 directs the replication  
854 stress response through CDK9 deacetylation. *Proc Natl Acad Sci U S A* 110:  
855 13546–13551

856

857

858

859

860

861

862

863

864

865

866

867

868

869

870

871 **FIGURE LEGENDS**

872

873 **Figure 1: SIRT2 activity maintains host cell viability and genome integrity during**  
874 ***L. monocytogenes* infection.**

875 HeLa cells pre-treated for 2 hours in DMSO or 5 mM AGK2 were left uninfected (UI)  
876 or infected (EGD) with *L. monocytogenes* for 6 and 24 hours (A) or 24 hours (B). **(A)**  
877 Cytotoxicity was measured Alamar blue assay. Results are expressed as percent  
878 viability of uninfected cells. Plot shows mean  $\pm$  SEM from three independent  
879 experiments. Statistical significance was determined by a Kruskal-Wallis test (ns = not  
880 significant, \* =  $p < 0.05$ , \*\* =  $p < 0.01$ ). **(B)** Representative images of  
881 immunofluorescence (left) detection of endogenous  $\gamma$ H2aX (red) in HeLa cells left  
882 uninfected (UI) or infected for 24 hours with GFP-expressing *L. monocytogenes* (*Lm*-  
883 GFP). Scale bar is 20  $\mu$ m. Quantification of nuclear  $\gamma$ H2aX (right) from HeLa cells, data  
884 points represent the mean fluorescence intensity (MFI) of  $\gamma$ H2aX within individual  
885 nuclei. Graphs display quantified nuclei from 2 independent experiments with the mean  
886 values of each condition represent by lines (red). Statistical significance was  
887 determined by one-way ANOVA with FDR Benjamini-Hochberg (BH) correction for  
888 multiple comparisons (ns = not significant, \*\*\*\* =  $p < <0.0001$ ). **(C)** Immunoblot  
889 detection of stated proteins from infected mouse spleen lysates (left). Quantification of  
890 normalised H3K18-ac and  $\gamma$ H2aX levels. Graphs show collated values from 8 mice  
891 from two independent experiments, box and whisker plot with solid line denoting the  
892 median value. Statistical significance was determined by Two-tailed Unpaired t test (\*  
893 =  $p < 0.05$ , \*\*\* =  $p < 0.001$ ). **(D)** Immunoblot detection of  $\gamma$ H2aX and total H2aX (left)  
894 from whole cell lysates of HeLa cells left uninfected (-) or infected with *L.*  
895 *monocytogenes* (EGD) for 24 hours. Cells are expressing stated H3-GFP plasmids  
896 and treated with DMSO or 5 mM AGK2. Images are representative of three  
897 independent experiments. Quantification of  $\gamma$ H2aX levels (right) relative to uninfected.  
898 Results are expressed as intensity of actin normalised  $\gamma$ H2aX bands relative to actin  
899 normalised total H2aX. Graph shows the mean  $\pm$  SEM from three independent  
900 experiments. Statistical significance was determined by one-way ANOVA with Fisher's  
901 LSD test (ns = not significant, \*\*\* =  $p < 0.001$ , \*\*\*\* =  $p < 0.0001$ ).

902

903 **Figure 2: TDP-43 interacts with SIRT2 and is required for chromatin interactions**  
904 **and gene targeting upon infection.**

905 **(A)** HeLa cells expressing either GFP alone or SIRT2-GFP were left uninfected (-) or  
906 infected (+) for 3 hours. Cells were lysed and underwent immunoprecipitation using  
907 GFP-Trap® agarose beads. Cell lysates (Input) and IP fractions were immunoblotted  
908 using antibodies against GFP or TDP-43 (left). Quantification of endogenous TDP-43  
909 enriched by GFP or SIRT2-GFP (right). Graph shows input normalised intensities of  
910 TDP-43 protein relative to SIRT2-GFP intensity detected from the same sample.  
911 Enrichment is expressed relative to basal interaction observed on uninfected cells.  
912 Graph shows the mean  $\pm$  SEM from three independent experiments.

913 **(B)** Chromatin immunoprecipitation (ChIP) using non-targeting control (Ctrl IgG) or  
914 TDP-43 (TDP-43 IgG) targeting antibodies quantified by qPCR. Chromatin was  
915 extracted from uninfected (UI - green) or infected (EGD - blue) HeLa cells 6 hours post  
916 infection. qPCR was carried out using primers targeting the transcriptional start sites  
917 of stated SIRT2-dependent or independent (gray background) genes. Graphs show  
918 collated technical readings (n=4) from three independent experiments and are  
919 presented as percent recovery of ChIP relative to input and plotted as box and whisker  
920 plot with solid line denoting the median value. Statistical significance determined by  
921 two-way ANOVA with FDR Benjamini-Hochberg (BH) correction for multiple  
922 comparisons (ns = not significant, \* =  $p < 0.05$ , \*\* =  $p < 0.01$ , \*\*\* =  $p < 0.001$ ).

923 **(C)** Chromatin immunoprecipitation (ChIP) using non-targeting control (Ctrl IgG) or GFP  
924 (GFP IgG) targeting antibodies quantified by qPCR. Chromatin was extracted from  
925 HeLa cells stably expressing SIRT2-GFP and transfected with non-targeting *Scramble*  
926 (Green) or *TARDBP* targeting (Orange) siRNA. Cells were left uninfected (UI -clear) or  
927 infected (EGD - dotted) for 6 hours. qPCR was carried out using primers targeting the  
928 transcriptional start sites of stated SIRT2-dependent or independent (red box) genes.  
929 Graphs show collated technical readings (n=4) from three independent experiments  
930 and are presented as percent recovery of ChIP relative to input and plotted as box and  
931 whisker plot with solid line denoting the median value. Statistical significance  
932 determined by two-way ANOVA with FDR Benjamini-Hochberg (BH) correction for  
933 multiple comparisons (ns = not significant, \* =  $p < 0.05$ , \*\* =  $p < 0.01$ , \*\*\* =  $p < 0.001$ ,  
934 \*\*\*\* =  $p < 0.0001$ ).

935

936 **Figure 3: Silencing TDP-43 expression blocks H3K18 deacetylation and other**  
937 **SIRT2-related phenotypes during infection.**

938 **(A)** Representative image of H3K18 acetylation, SIRT2 and TDP-43 levels detected by  
939 immunoblotting (left) 6 hours post infection in uninfected HeLa (-) and *L.*  
940 *monocytogenes*-infected cells (+) transfected with stated siRNA. Quantification of  
941 H3K18 acetylation levels (right): band intensity of H3K18-ac and total H3 levels are  
942 normalised to  $\beta$ -actin followed by normalisation of H3K18-ac to total H3. Values are  
943 expressed as normalised band intensity relative to uninfected *Scramble* cells. Error  
944 bars represent SEM of four independent experiments. Statistical significance was  
945 determined by a Kruskal-Wallis test (ns = not significant, \*\* =  $p < 0.01$ ). **(B)** Fold  
946 change of intracellular *L. monocytogenes* colony forming units during infection of HeLa  
947 cells transfected with stated siRNAs. Data are presented as fold-change in recovered  
948 intracellular CFU between 2.5 and 24 hours post infection relative to *Scramble* siRNA  
949 cells. Graph shows the mean  $\pm$  SEM from three independent experiments. Statistical  
950 significance was determined by a Kruskal-Wallis test (\* =  $p < 0.05$ , \*\* =  $p < 0.01$ ).

951  
952 **Figure 4: Blocking R-loop formation by overexpressing RNaseH1 inhibits infection**  
953 **induced H3K18 deacetylation and supresses bacterial intracellular survival.**

954 **(A)** Immunoblot analysis of H3K18 acetylation 6 hours post infection (left) in uninfected  
955 (-) and infected (+) HeLa cells expressing either mCherry, WT RNaseH1 or catalytically  
956 inactive RNaseH1 (dead). Quantification of H3K18 acetylation (right). H3K18-ac and  
957 total H3 levels band intensities are normalised to  $\beta$ -actin followed by normalisation of  
958 H3K18-ac to total H3. Values are expressed as normalised band intensity relative to  
959 uninfected mCherry cells. Error bars represent the SEM from at least three  
960 independent experiments. Statistical significance was determined by a Kruskal-Wallis  
961 test (ns = not significant, \* =  $p < 0.05$ ). **(B)** Fold change of intracellular *L.*  
962 *monocytogenes* colony forming units during infection of HeLa cells expressing stated  
963 plasmid constructs treated with wither DMSO or 5 mM AGK2. Data are presented as  
964 the fold-change in recovered intracellular CFU for each cell type at 6 and 24 hours post  
965 infection relative to their corresponding 2.5-hour timepoint. Graphs show the mean  $\pm$   
966 SEM from three independent experiments. Statistical significance was determined by  
967 two-way ANOVA with FDR Benjamini-Hochberg (BH) correction for multiple  
968 comparisons (ns = not significant, \*\* =  $p < 0.01$ ).

969 **Figure 5: SIRT2, TDP-43 and R-loops function to protect cells from infection**  
970 **induced DNA damage.**

971 Immunoblot detection of  $\gamma$ H2aX and total H2aX from whole cell lysates of HeLa cells  
972 transfected with stated siRNAs and left uninfected (-) or infected (+) for **(A)** 6 hours or **(B)**  
973 24 hours. Quantified band intensities of  $\gamma$ H2aX levels are present in graphs (right).  
974 Results are expressed as intensity of actin normalised  $\gamma$ H2aX bands relative to actin  
975 normalised total H2aX. Graph shows the mean  $\pm$  SEM from at least three independent  
976 experiments statis. Statistical significance was determined by one-way ANOVA with  
977 Dunnet correction for multiple comparisons (ns = not significant, \*\* =  $p < 0.01$ , \*\*\*\* =  
978  $p < 0.0001$ ). **(C)** HeLa cells expressing either mCherry or mCherry-RNaseH1 were  
979 infected for 24 hours, immunoblot analyses and quantification of  $\gamma$ H2aX (right)  
980 performed as stated for (A) and (B) \*denotes non-specific band. Graph shows the  
981 mean  $\pm$  SEM from five independent experiments. Statistical significance was  
982 determined by Two-tailed Unpaired t test (\*\*\* =  $p < 0.001$ ).

983

984 **Figure 6: Model of host genome integrity protection by SIRT2.**

985 Schematic model of SIRT2 mechanisms of host cell protection and enhancement of  
986 infection. During infection, SIRT2 activity is hijacked by *Listeria* and is translocated to  
987 nucleus mediating H3K18 deacetylation. Recruitment to chromatin and histone  
988 deacetylation require TDP-43 and R-loops, which define the localisation of SIRT2 to  
989 specific genes. H3K18 deacetylation then directly functions to protect host genomic  
990 DNA from accumulating excessive DNA damage induced during infection by unknown  
991 mechanisms. This promotes genome integrity and cell viability thereby better  
992 supporting the intracellular lifestyle of *Listeria* and resulting in enhanced infection.

993

994 **Figure S1: SIRT2 inhibition effects cell viability and DNA damage during infection.**

995 HeLa cells pre-treated for 2 hours with DMSO or 5 mM AGK2 (A-D). **(A)** Enumeration  
996 of live (Trypan negative) and dead (Trypan positive) cells at stated times post infection.  
997 Cells were enumerated with Countess™ II Automated Cell Counter from 2 independent  
998 experiments with the me. **(B)** Reprehensive unmerged images of nuclear  $\gamma$ H2aX from  
999 uninfected and infected cells as presented in Fig. 1B. **(C)** Percentage of  $\gamma$ H2aX positive  
1000 cells from Fig. 1B. Error bars represent the SEM from four independent experiments.  
1001 Statistical significance was calculated by two-way ANOVA with FDR Benjamini-

1002 Hochberg (BH) correction for multiple comparisons (ns = not significant, \* =  $p < 0.05$ ).  
1003 **(D)** Descriptive statistics of microscopy analysis presented in Fig. 1B. **(E)** Total *L.*  
1004 *monocytogenes* CFU per spleen extracted from *wildtype* and *Sirt2*<sup>-/-</sup> mice 72 hours post  
1005 infection.

1006

1007 **Figure S2: Identification of SIRT2-interacting partners shown to localise to SIRT2-**  
1008 **regulated genes by ChIP-seq**

1009 Venn diagrams illustrating proteins shared between SIRT2-interactome and interactors  
1010 of the TSSs of *MYLIP*, *ERRC5*, *LEF1*, *SYDE2*, *EHHADH* and *ARAP2*.

1011

1012 **Figure S3: Phosphorylation of SIRT2 at S25 modulates interactions with TDP-43**

1013 HeLa cells expressing either mCherry alone or mCherry-TDP-43 were co-transfected  
1014 with stated variants of SIRT2-GFP followed by immunoprecipitation using RFP-Trap®  
1015 agarose beads. Cell lysates (Input) and IP fractions were immunoblotted using  
1016 antibodies against TDP-43 or GFP for detection of SIRT2.

1017

1018 **Figure S4: Knockdown of SIRT2 or TDP-43 reduces long term efficacy of *Listeria***  
1019 **infection**

1020 Relative mRNA expression of **(A)** *SIRT2* and **(B)** *TARDBP* as detected by qPCR  
1021 normalised to GAPDH. Mean ± S.E.M from three independent experiments are plotted.  
1022 **(C)** Quantification of *L. monocytogenes* intracellular CFUs. HeLa cells were  
1023 transfected with indicated siRNAs and infected for 2.5 h or 24 h. Lysates were plated  
1024 onto BHI agar and bacterial CFUs were enumerated. Data are presented as CFU/well.  
1025 Individual biological replicates are plotted as paired values.

1026

1027

1028 **Figure S5: Blocking R-loop formation reduces long term efficacy of *Listeria***  
1029 **infection**

1030 Quantification of *L. monocytogenes* intracellular CFU/cell. HeLa cells expressing  
1031 either mCherry or RNaseH1 were treated with DMSO or 5 mM AGK2 then infected  
1032 with *L. monocytogenes*. Intracellular bacteria were extracted at 2.5, 6 and 24 hours  
1033 post infection plated onto BHI agar and bacterial CFUs were enumerated. Data are  
1034 presented as average CFU/cell. Mean ± S.E.M from three independent experiments  
1035 are plotted.

# Figure 1

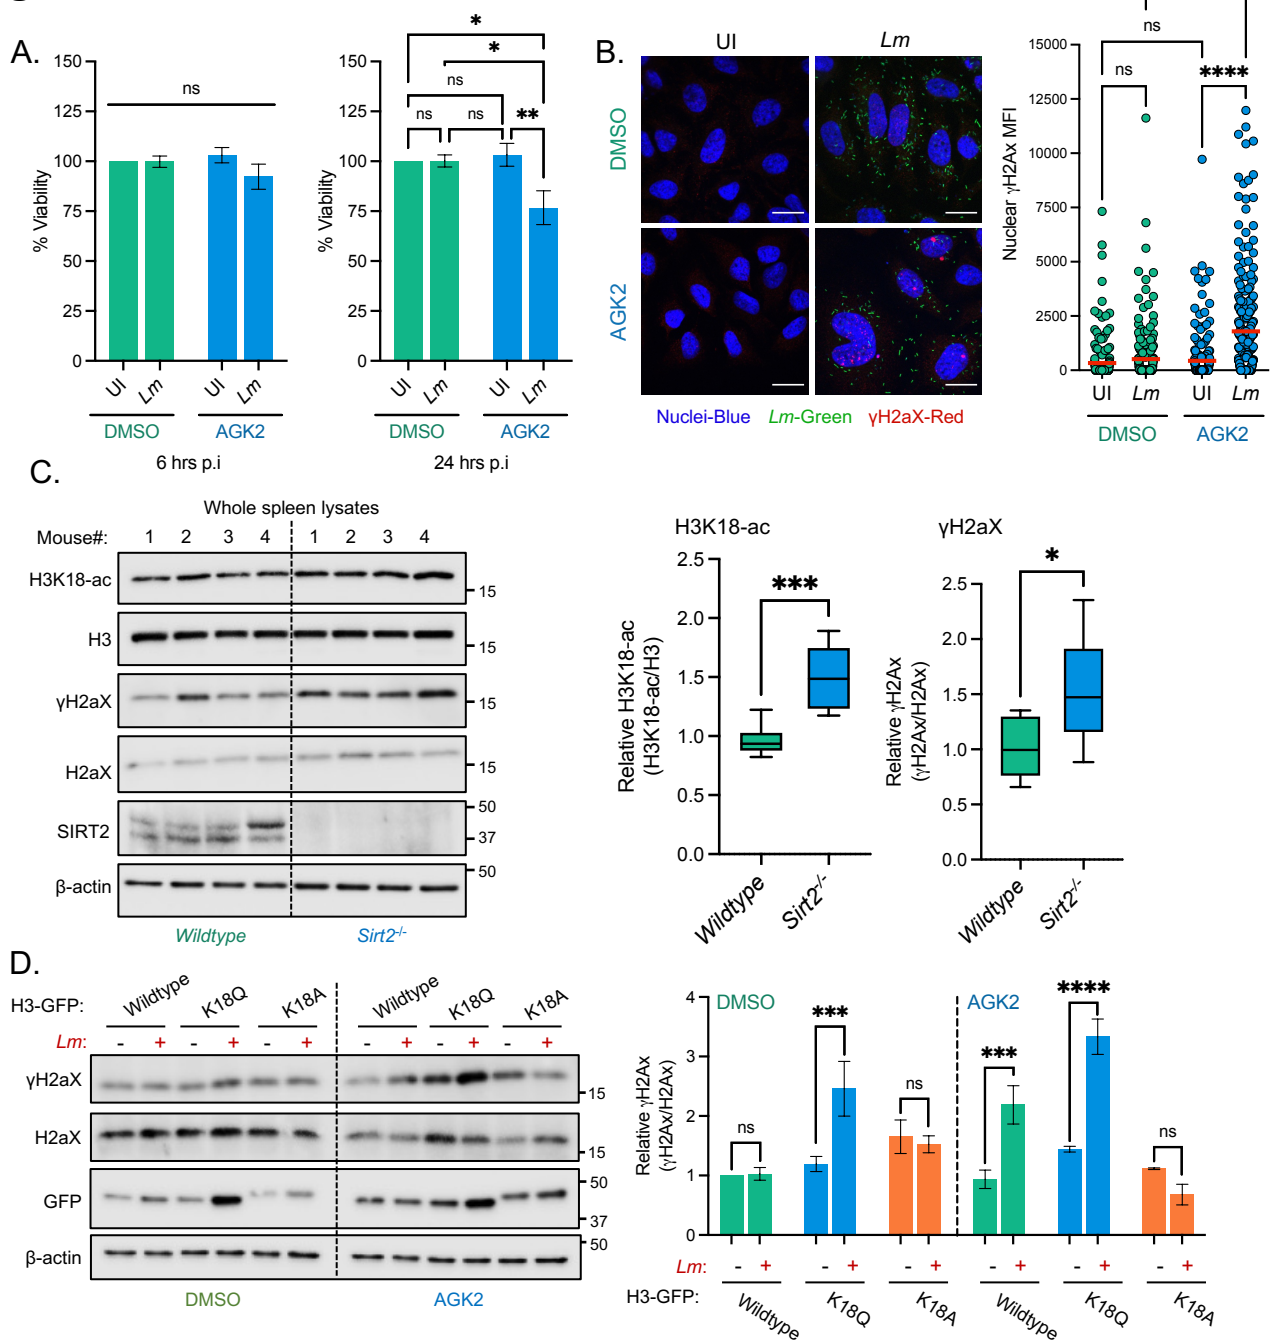

**Figure 1: SIRT2 activity maintains host cell viability and genome integrity during *L. monocytogenes* infection.**

HeLa cells pre-treated for 2 hours in DMSO or 5 mM AGK2 were left uninfected (UI) or infected (EGD) with *L. monocytogenes* for 6 and 24 hours (A) or 24 hours (B). (A) Cytotoxicity was measured Alamar blue assay. Results are expressed as percent viability of uninfected cells. Plot shows mean  $\pm$  SEM from three independent experiments. Statistical significance was determined by a Kruskal-Wallis test (ns = not significant, \* =  $p < 0.05$ , \*\* =  $p < 0.01$ ). (B) Representative images of immunofluorescence (left) detection of endogenous  $\gamma$ H2Ax (red) in HeLa cells left uninfected (UI) or infected for 24 hours with GFP-expressing *L. monocytogenes* (*Lm*-GFP). Scale bar is 20  $\mu$ m. Quantification of nuclear  $\gamma$ H2Ax (right) from HeLa cells, data points represent the mean fluorescence intensity (MFI) of  $\gamma$ H2Ax within individual nuclei. Graphs display quantified nuclei from 2 independent experiments with the mean values of each condition represent by lines (red). Statistical significance was determined by one-way ANOVA with FDR Benjamini-Hochberg (BH) correction for multiple comparisons (ns = not significant, \*\*\*\* =  $p < 0.0001$ ). (C) Immunoblot detection of stated proteins from infected mouse spleen lysates (left). Quantification of normalised H3K18-ac and  $\gamma$ H2Ax levels. Graphs show collated values from 8 mice from two independent experiments, box and whisker plot with solid line denoting the median value. Statistical significance was determined by Two-tailed Unpaired t test (\* =  $p < 0.05$ , \*\*\* =  $p < 0.001$ ). (D) Immunoblot detection of  $\gamma$ H2Ax and total H2Ax (left) from whole cell lysates of HeLa cells left uninfected (-) or infected with *L. monocytogenes* (EGD) for 24 hours. Cells are expressing stated H3-GFP plasmids and treated with DMSO or 5 mM AGK2. Images are representative of three independent experiments. Quantification of  $\gamma$ H2Ax levels (right) relative to uninfected. Results are expressed as intensity of actin normalised  $\gamma$ H2Ax bands relative to actin normalised total H2Ax. Graph shows the mean  $\pm$  SEM from three independent experiments. Statistical significance was determined by one-way ANOVA with Fisher's LSD test (ns = not significant, \*\*\* =  $p < 0.001$ , \*\*\*\* =  $p < 0.0001$ ).



# Figure 2

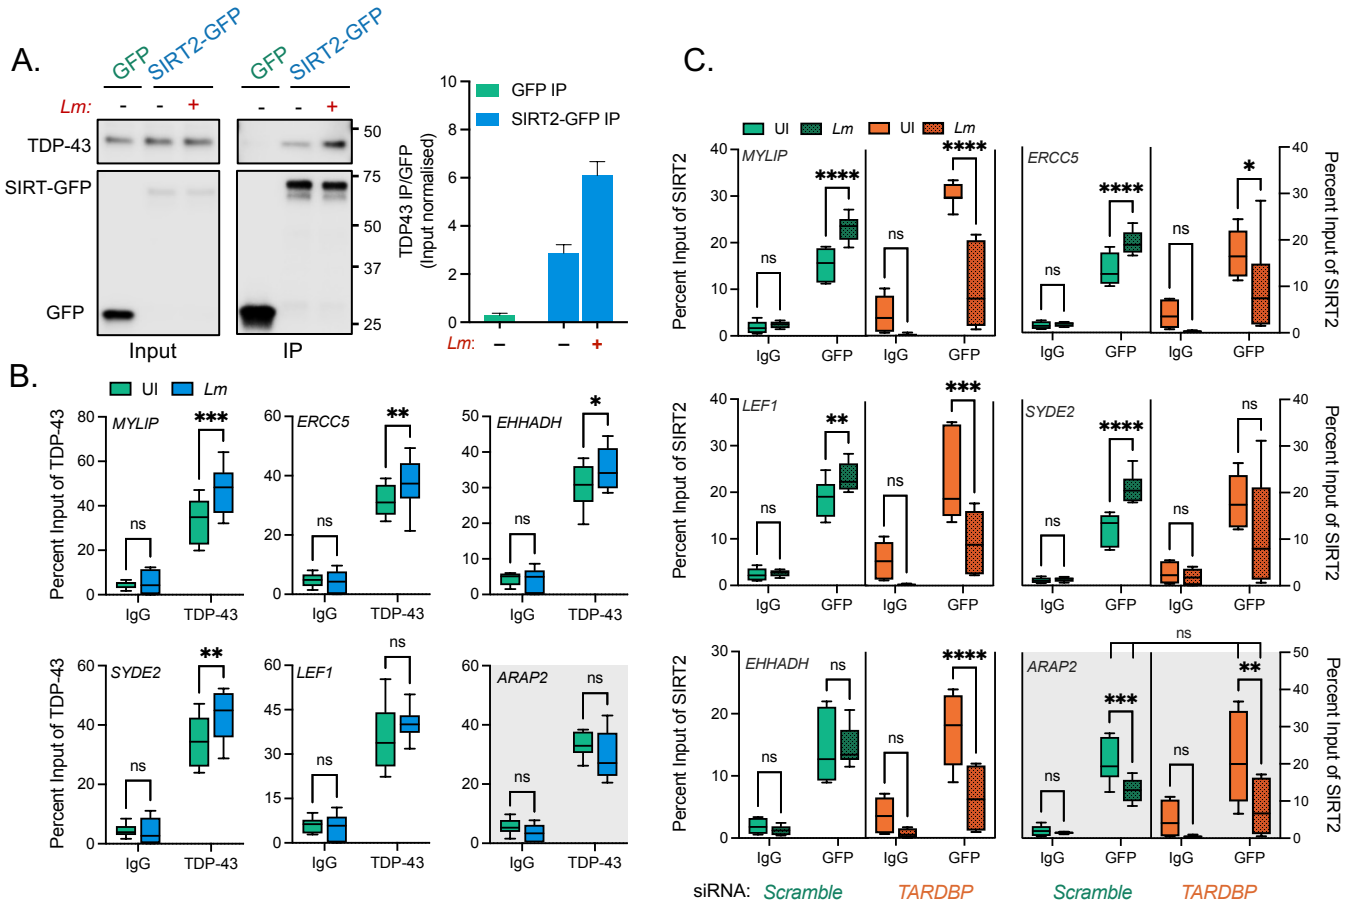

**Figure 2: TDP-43 interacts with SIRT2 and is required for chromatin interactions and gene targeting upon infection.**

**(A)** HeLa cells expressing either GFP alone or SIRT2-GFP were left uninfected (-) or infected (+) for 3 hours. Cells were lysed and underwent immunoprecipitation using GFP-Trap® agarose beads. Cell lysates (Input) and IP fractions were immunoblotted using antibodies against GFP or TDP-43 (left). Quantification of endogenous TDP-43 enriched by GFP or SIRT2-GFP (right). Graph shows input normalised intensities of TDP-43 protein relative to SIRT2-GFP intensity detected from the same sample. Enrichment is expressed relative to basal interaction observed on uninfected cells. Graph shows the mean  $\pm$  SEM from three independent experiments. **(B)** Chromatin immunoprecipitation (ChIP) using non-targeting control (Ctrl IgG) or TDP-43 (TDP-43 IgG) targeting antibodies quantified by qPCR. Chromatin was extracted from uninfected (UI - green) or infected (EGD - blue) HeLa cells 6 hours post infection. qPCR was carried out using primers targeting the transcriptional start sites of stated SIRT2-dependent or independent (gray background) genes. Graphs show collated technical readings (n=4) from three independent experiments and are presented as percent recovery of ChIP relative to input and plotted as box and whisker plot with solid line denoting the median value. Statistical significance determined by two-way ANOVA with FDR Benjamini-Hochberg (BH) correction for multiple comparisons (ns = not significant, \* =  $p < 0.05$ , \*\* =  $p < 0.01$ , \*\*\* =  $p < 0.001$ ). **(C)** Chromatin immunoprecipitation (ChIP) using non-targeting control (Ctrl IgG) or GFP (GFP IgG) targeting antibodies quantified by qPCR. Chromatin was extracted from HeLa cells stably expressing SIRT2-GFP and transfected with non-targeting *Scramble* (Green) or *TARDBP* targeting (Orange) siRNA. Cells were left uninfected (UI - clear) or infected (EGD - dotted) for 6 hours. qPCR was carried out using primers targeting the transcriptional start sites of stated SIRT2-dependent or independent (red box) genes. Graphs show collated technical readings (n=4) from three independent experiments and are presented as percent recovery of ChIP relative to input and plotted as box and whisker plot with solid line denoting the median value. Statistical significance determined by two-way ANOVA with FDR Benjamini-Hochberg (BH) correction for multiple comparisons (ns = not significant, \* =  $p < 0.05$ , \*\* =  $p < 0.01$ , \*\*\* =  $p < 0.001$ , \*\*\*\* =  $p < 0.0001$ ).

# Figure 3

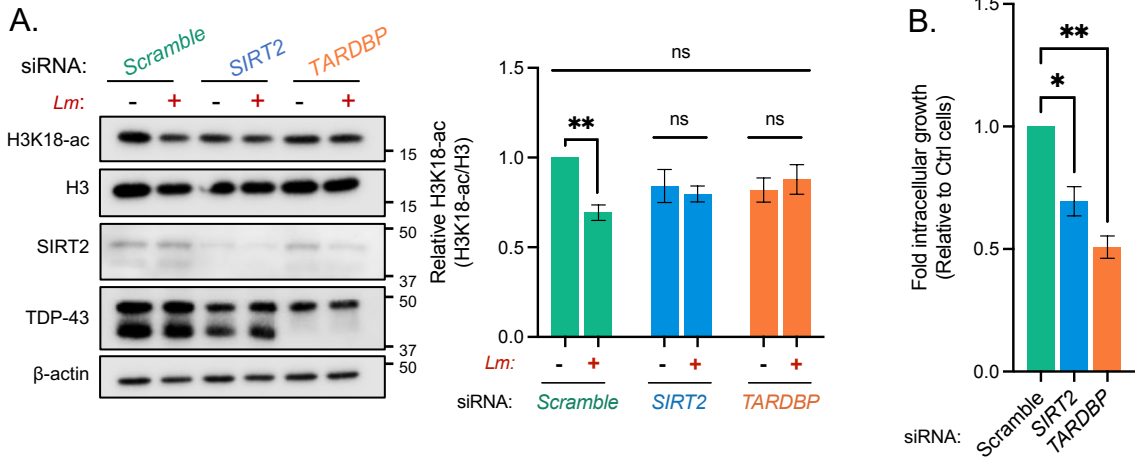

**Figure 3: Silencing TDP-43 expression blocks H3K18 deacetylation and other SIRT2-related phenotypes during infection.**

**(A)** Representative image of H3K18 acetylation, SIRT2 and TDP-43 levels detected by immunoblotting (left) 6 hours post infection in uninfected HeLa (-) and *L. monocytogenes*-infected cells (+) transfected with stated siRNA. Quantification of H3K18 acetylation levels (right): band intensity of H3K18-ac and total H3 levels are normalised to β-actin followed by normalisation of H3K18-ac to total H3. Values are expressed as normalised band intensity relative to uninfected *Scramble* cells. Error bars represent SEM of four independent experiments. Statistical significance was determined by a Kruskal-Wallis test (ns = not significant, \*\* =  $p < 0.01$ ). **(B)** Fold change of intracellular *L. monocytogenes* colony forming units during infection of HeLa cells transfected with stated siRNAs. Data are presented as fold-change in recovered intracellular CFU between 2.5 and 24 hours post infection relative to *Scramble* siRNA cells. Graph shows the mean ± SEM from three independent experiments. Statistical significance was determined by a Kruskal-Wallis test (\* =  $p < 0.05$ , \*\* =  $p < 0.01$ ).

# Figure 4

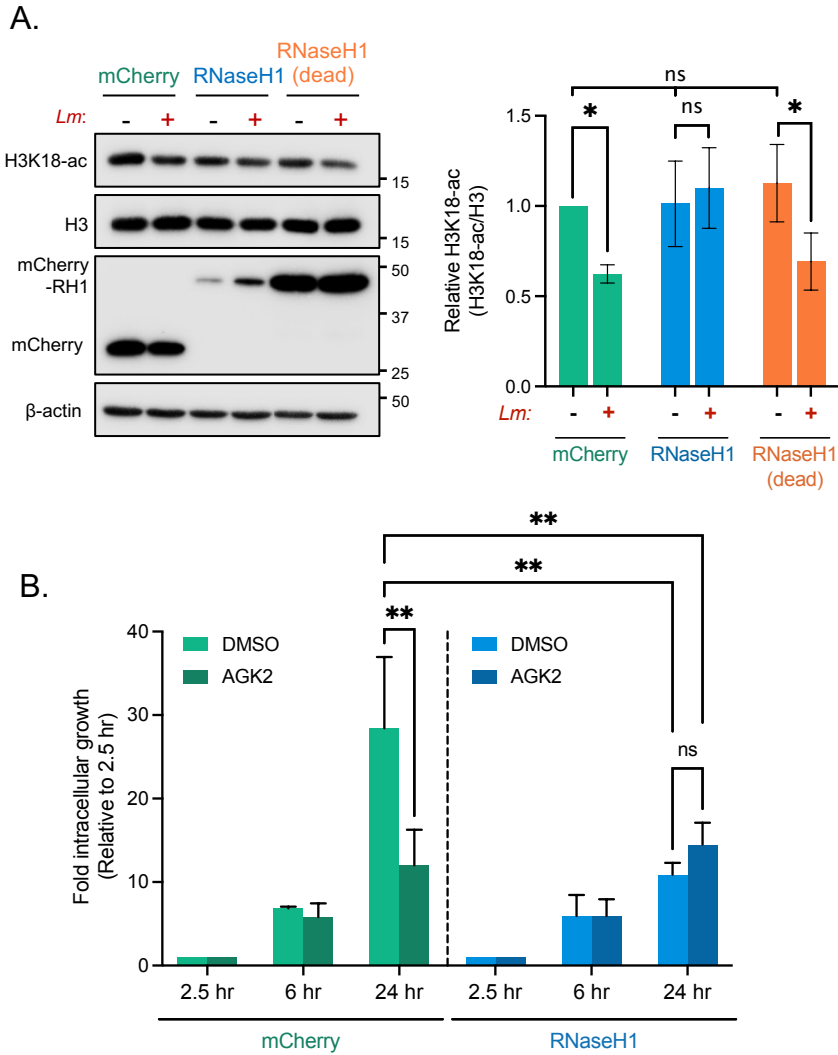

**Figure 4: Blocking R-loop formation by overexpressing RNaseH1 inhibits infection induced H3K18 deacetylation and suppresses bacterial intracellular survival.**

**(A)** Immunoblot analysis of H3K18 acetylation 6 hours post infection (left) in uninfected (-) and infected (+) HeLa cells expressing either mCherry, WT RNaseH1 or catalytically inactive RNaseH1 (dead). Quantification of H3K18 acetylation (right). H3K18-ac and total H3 levels band intensities are normalised to  $\beta$ -actin followed by normalisation of H3K18-ac to total H3. Values are expressed as normalised band intensity relative to uninfected mCherry cells. Error bars represent the SEM from at least three independent experiments. Statistical significance was determined by a Kruskal-Wallis test (ns = not significant, \* =  $p < 0.05$ ). **(B)** Fold change of intracellular *L. monocytogenes* colony forming units during infection of HeLa cells expressing stated plasmid constructs treated with either DMSO or 5 mM AGK2. Data are presented as the fold-change in recovered intracellular CFU for each cell type at 6 and 24 hours post infection relative to their corresponding 2.5-hour timepoint. Graphs show the mean  $\pm$  SEM from three independent experiments. Statistical significance was determined by two-way ANOVA with FDR Benjamini-Hochberg (BH) correction for multiple comparisons (ns = not significant, \*\* =  $p < 0.01$ ).

# Figure 5

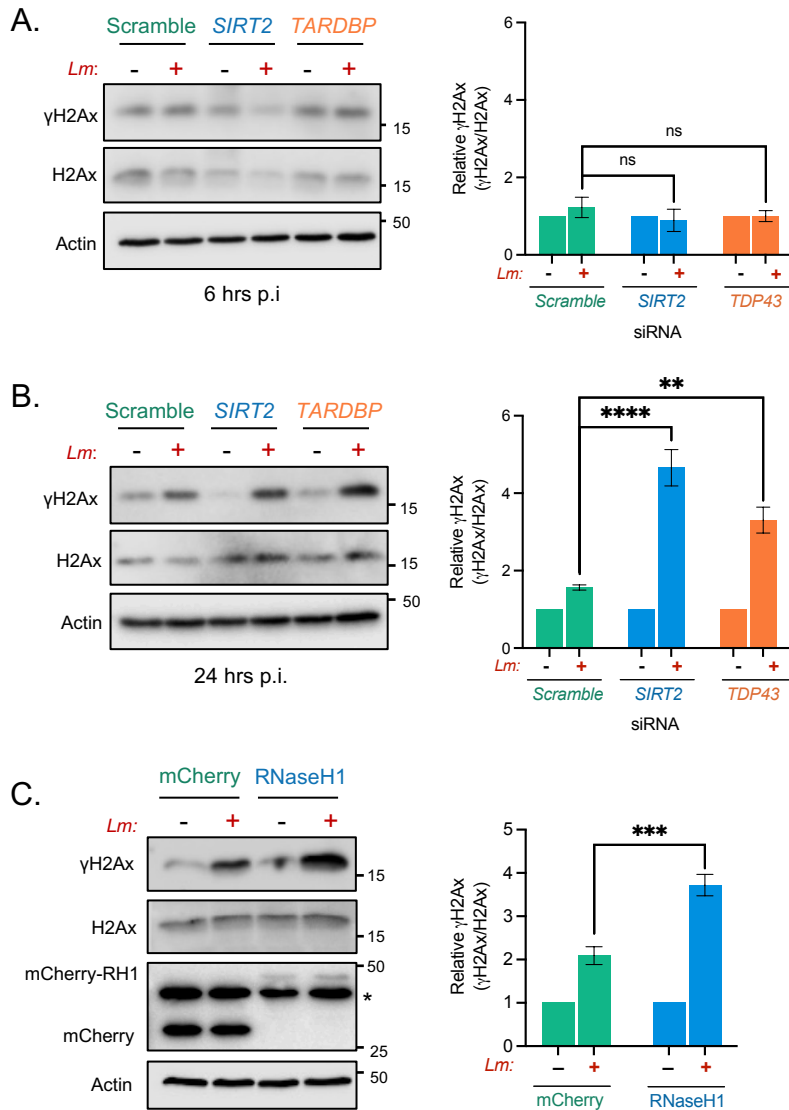

**Figure 5: SIRT2, TDP-43 and R-loops function to protect cells from infection induced DNA damage.**

Immunoblot detection of  $\gamma$ H2aX and total H2aX from whole cell lysates of HeLa cells transfected with stated siRNAs and left uninfected (-) or infected (+) for **(A)** 6 hours or **(B)** 24 hours. Quantified band intensities of  $\gamma$ H2aX levels are present in graphs (right). Results are expressed as intensity of actin normalised  $\gamma$ H2aX bands relative to actin normalised total H2aX. Graph shows the mean  $\pm$  SEM from at least three independent experiments. Statistical significance was determined by one-way ANOVA with Dunnet correction for multiple comparisons (ns = not significant, \*\* =  $p < 0.01$ , \*\*\*\* =  $p < 0.0001$ ). **(C)** HeLa cells expressing either mCherry or mCherry-RNaseH1 were infected for 24 hours, immunoblot analyses and quantification of  $\gamma$ H2aX (right) performed as stated for (A) and (B) \*denotes non-specific band. Graph shows the mean  $\pm$  SEM from five independent experiments. Statistical significance was determined by Two-tailed Unpaired t test (\*\*\* =  $p < 0.001$ ).

**Figure 6**

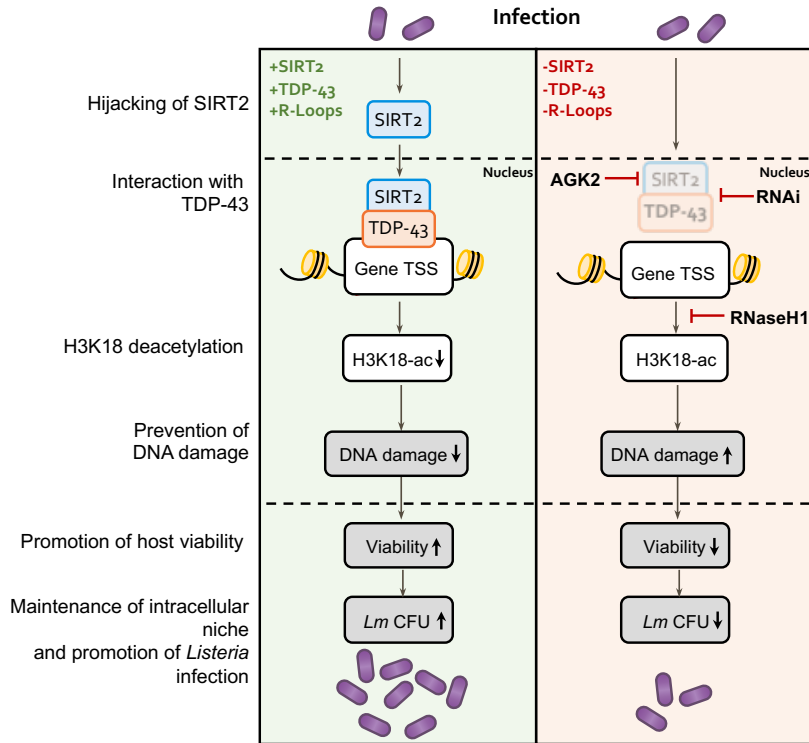

**Figure 6: Model of host genome integrity protection by SIRT2.**

Schematic model of SIRT2 mechanisms of host cell protection and enhancement of infection. During infection, SIRT2 activity is hijacked by *Listeria* and is translocated to nucleus mediating H3K18 deacetylation. Recruitment to chromatin and histone deacetylation require TDP-43 and R-loops, which define the localisation of SIRT2 to specific genes. H3K18 deacetylation then directly functions to protect host genomic DNA from accumulating excessive DNA damage induced during infection by unknown mechanisms. This promotes genome integrity and cell viability thereby better supporting the intracellular lifestyle of *Listeria* and resulting in enhanced infection.

# Supplementary Figure S1

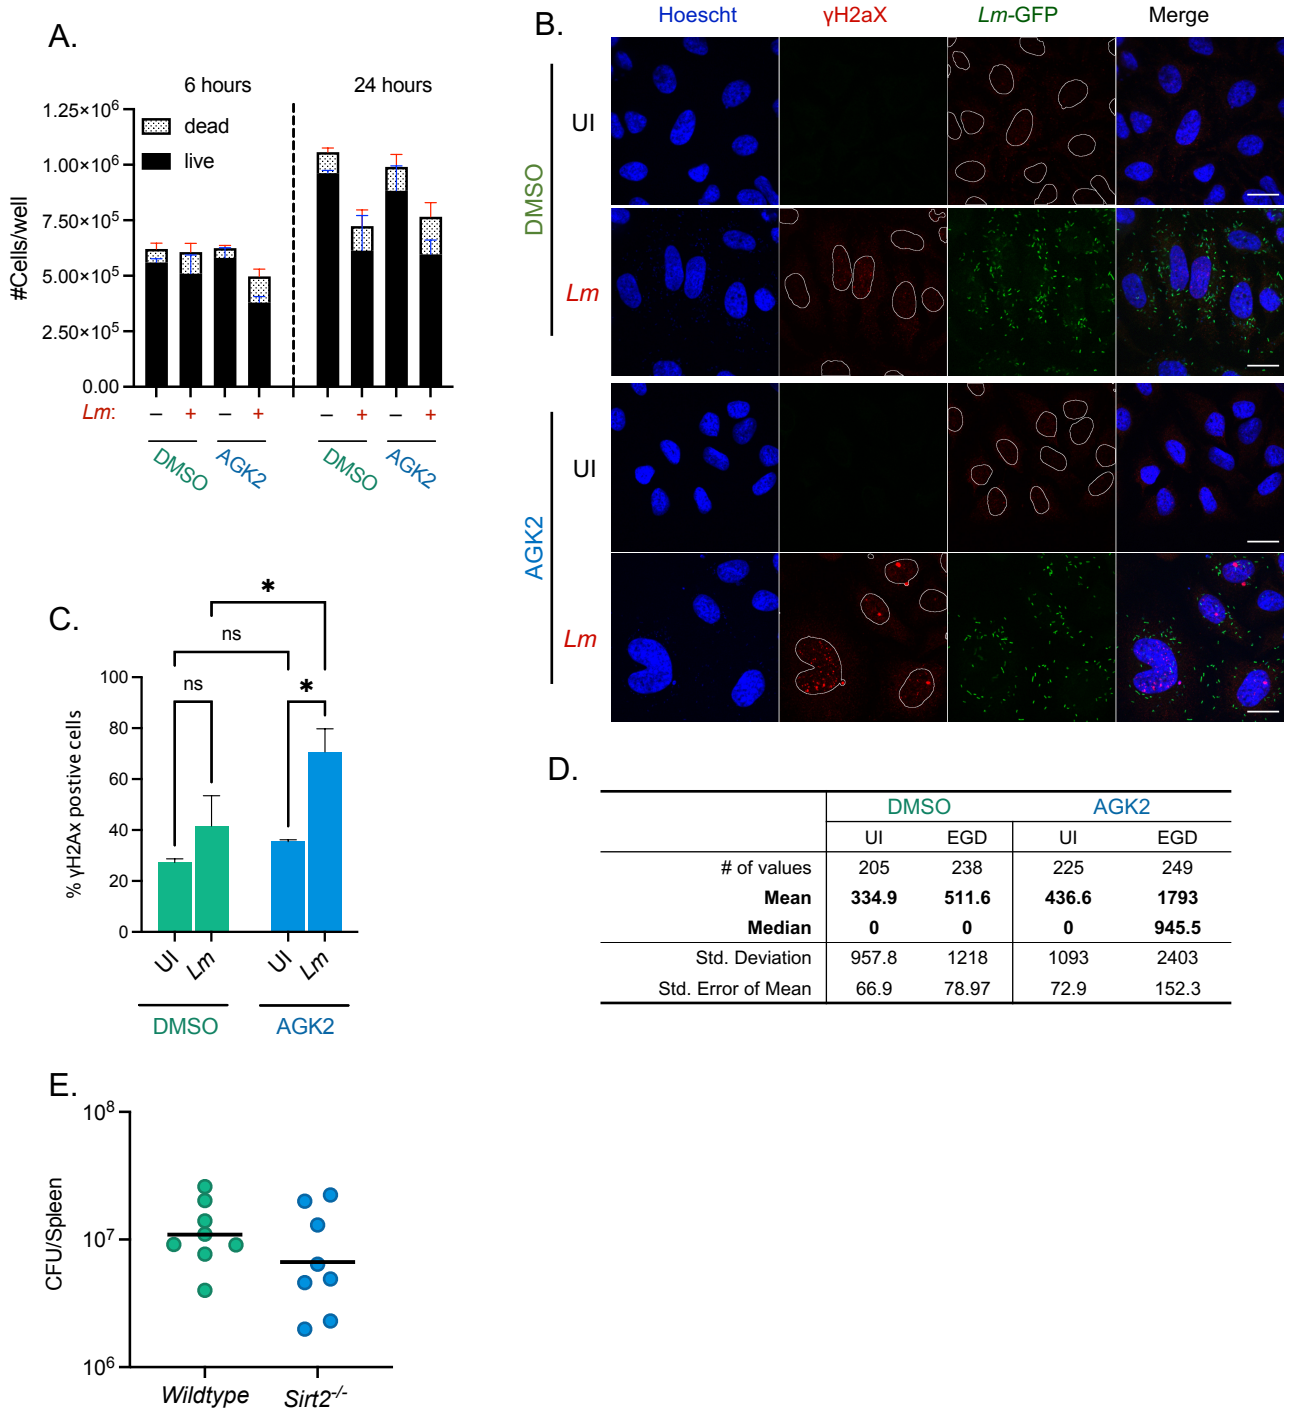

**Figure S1: SIRT2 inhibition effects cell viability and DNA damage during infection.**

HeLa cells pre-treated for 2 hours with DMSO or 5 mM AGK2 (A-D). **(A)** Enumeration of live (Trypan negative) and dead (Trypan positive) cells at stated times post infection. Cells were enumerated with Countess™ II Automated Cell Counter from 2 independent experiments with the me. **(B)** Reprehensive unmerged images of nuclear  $\gamma$ H2aX from uninfected and infected cells as presented in Fig. 1B. **(C)** Percentage of  $\gamma$ H2aX positive cells from Fig. 1B. Error bars represent the SEM from four independent experiments. Statistical significance was calculated by two-way ANOVA with FDR Benjamini-Hochberg (BH) correction for multiple comparisons (ns = not significant, \* =  $p < 0.05$ ). **(D)** Descriptive statistics of microscopy analysis presented in Fig. 1B. **(E)** Total *L. monocytogenes* CFU per spleen extracted from *wildtype* and *Sirt2*<sup>-/-</sup> mice 72 hours post infection.

# Supplementary Figure S2

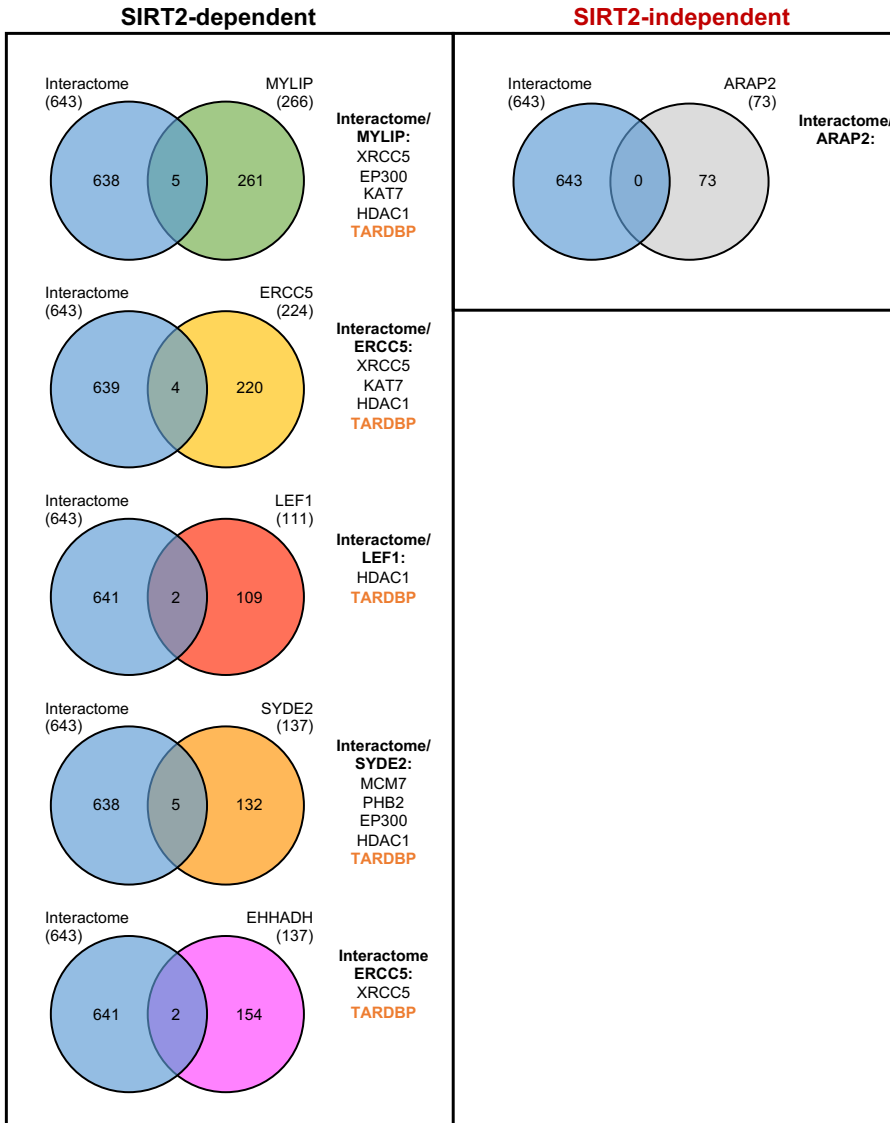

**Figure S2: Identification of SIRT2-interacting partners shown to localise to SIRT2-regulated genes by ChIP-seq**

Venn diagrams illustrating proteins shared between SIRT2-interactome and interactors of the TSSs of *MYLIP*, *ERCC5*, *LEF1*, *SYDE2*, *EHHADH* and *ARAP2*.

# Supplementary Figure S3

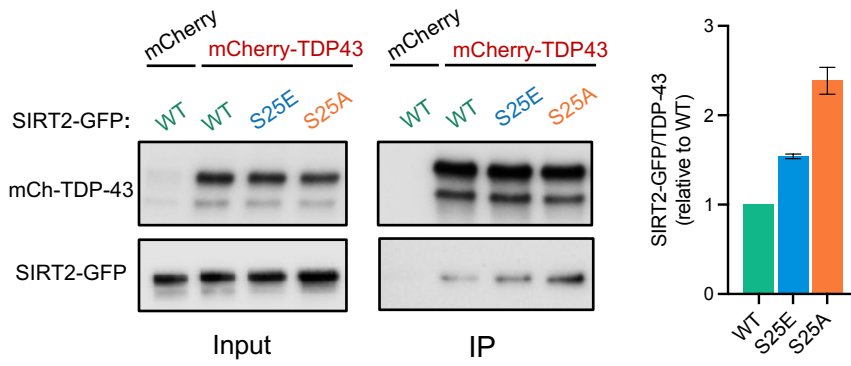

**Figure S3: Phosphorylation of SIRT2 at S25 modulates interactions with TDP-43**

HeLa cells expressing either mCherry alone or mCherry-TDP-43 were co-transfected with stated variants of SIRT2-GFP followed by immunoprecipitation using RFP-Trap® agarose beads. Cell lysates (Input) and IP fractions were immunoblotted using antibodies against TDP-43 or GFP for detection of SIRT2.



# Supplementary Figure S4

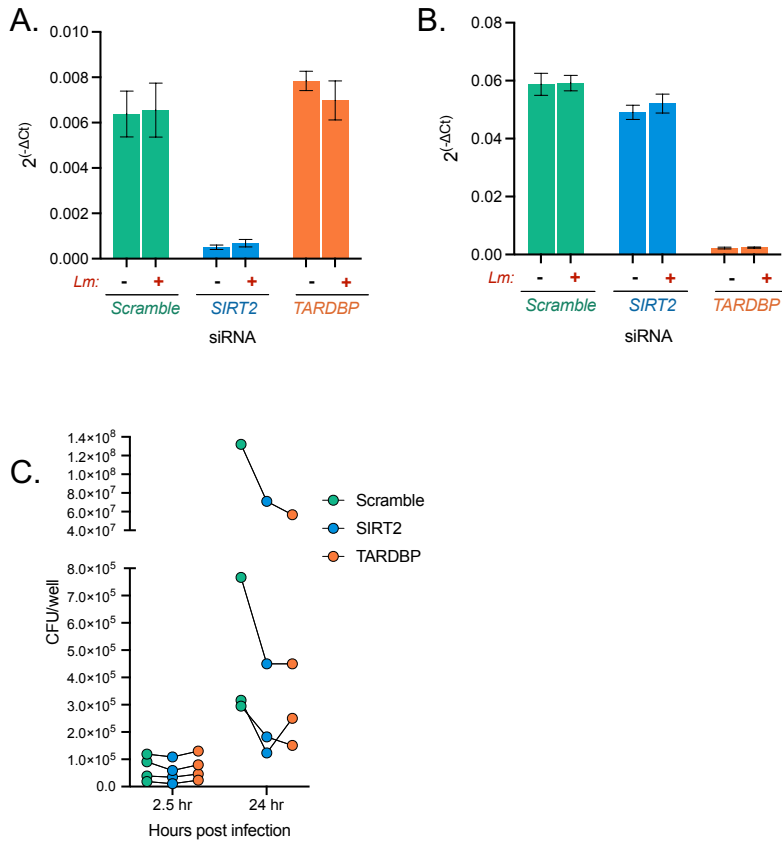

**Figure S4: Knockdown of SIRT2 or TDP-43 reduces long term efficacy of *Listeria* infection**

Relative mRNA expression of (A) *SIRT2* and (B) *TARDBP* as detected by qPCR normalised to GAPDH. Mean  $\pm$  S.E.M from three independent experiments are plotted. (C) Quantification of *L. monocytogenes* intracellular CFUs. HeLa cells were transfected with indicated siRNAs and infected for 2.5 h or 24 h. Lysates were plated onto BHI agar and bacterial CFUs were enumerated. Data are presented as CFU/well. Individual biological replicates are plotted as paired values.

## Supplementary Figure S5

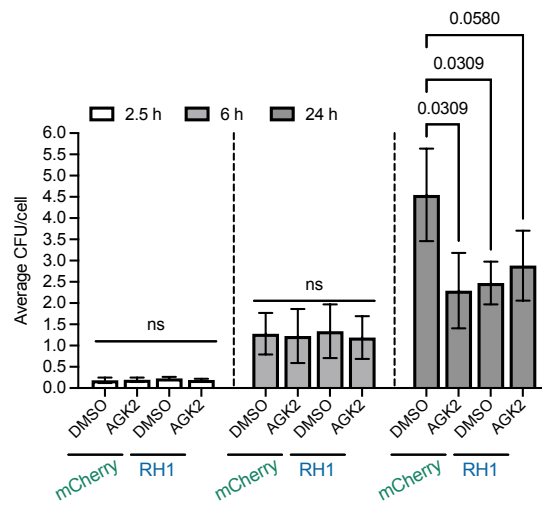

**Figure S5: Blocking R-loop formation reduces long term efficacy of *Listeria* infection**

Quantification of *L. monocytogenes* intracellular CFU/cell. HeLa cells expressing either mCherry or RNaseH1 were treated with DMSO or 5 mM AGK2 then infected with *L. monocytogenes*. Intracellular bacteria were extracted at 2.5, 6 and 24 hours post infection plated onto BHI agar and bacterial CFUs were enumerated. Data are presented as average CFU/cell. Mean  $\pm$  S.E.M from three independent experiments are plotted

# Supplementary Tables

Table S1: Bacterial strains used in study

| Bacterial strain              | Genotype     | Vector   | Strain number |
|-------------------------------|--------------|----------|---------------|
| <i>Listeria monocytogenes</i> | Wildtype EGD |          | BUG600        |
| <i>Listeria monocytogenes</i> | Wildtype EGD | pAD-cGFP | BUG2539       |

Table S2: Recipes of buffers used in this study

| Buffer                            | Components                                                                                                  |
|-----------------------------------|-------------------------------------------------------------------------------------------------------------|
| Nuclear Isolation buffer          | 15 mM Tris (pH 7.5), 60 mM KCl, 15 mM NaCl, 250 mM sucrose, 1 mM CaCl <sub>2</sub> , 5 mM MgCl <sub>2</sub> |
| Chromatin shearing buffer         | 1% SDS, 10 mM Tris HCl (pH 8.0), 1 mM EDTA, 0.5 mM EGTA                                                     |
| SDS dilution buffer               | 0.6% Triton X-100, 0.06% NaDOC, 150 mM NaCl, 12 mM Tris HCl (pH 8.0), 1 mM EDTA, 0.5 mM EGTA                |
| Buffer 1 (isotonic)               | 1% Triton X-100, 0.1% NaDOC, 150 mM NaCl, 10 mM Tris HCl (pH 8.0);                                          |
| Buffer 2 (isotonic, ionic change) | 0.5% NP40, 0.5% Triton X-100, 0.5% NaDOC, 150 mM NaCl, 10 mM Tris HCl (pH 8.0);                             |
| Buffer 3 (high salt dilution)     | 0.7% Triton X-100, 0.1% NaDOC, 250 mM NaCl, 10 mM Tris HCl (pH 8.0);                                        |
| Buffer 4 (high salt dilution)     | 0.5% NP40, 0.5% Triton X-100, 250 mM LiCl, 1 mM EDTA, 20 mM Tris HCl (pH 8.0);                              |
| Buffer 5 (salt dilution)          | 0.1% NP40, 150 mM NaCl, 1 mM EDTA, 20 mM Tris HCl (pH 8.0);                                                 |
| Buffer 6 (TE)                     | 1 mM EDTA, 20 mM Tris HCl (pH 8.0)                                                                          |

Table S3: Primers used in this study

| Primer name               | Sequence 5' - 3'                                               |
|---------------------------|----------------------------------------------------------------|
| <b>Cloning primers</b>    |                                                                |
| mCherry_TDP43_Fw          | GGT CAG GTT CGG GCA GTG GAT CCG GAA TGT CTG AAT ATA TTC GGG TA |
| mCherry_TDP43_Rv          | CAG TTA TCT AGA TCC GGT GGA TCC CGG TTA CAT TCC CCA GCC AGA AG |
| <b>Mutagenesis primer</b> |                                                                |
| Mut-Rnase-D10R Xhol       | TGG AAA TCT TCA CTC GAG GCA GCT GTC TG                         |
| Mut-Rnase-E48R BsmI       | CAC CAA CAA CCG AAT GCG ACT GAT GGC CGC CA                     |
| <b>qPCR primers</b>       |                                                                |
| TARDBP_Fw                 | ATG TCT TCA TCC CCA AGC C                                      |
| TARDBP_Rv                 | TTA CCA CCA AAT CTT CCA CTT C                                  |
| SIRT2_Fw                  | GCC AAC CAT CTG TCA CTA CTT                                    |
| SIRT2_Rv                  | TCG CTC CAG GGT ATC TAT GT                                     |
| <b>ChIP primers</b>       |                                                                |
| MYLIP_3                   | TGGACTGCAGTTTACGGGTAGCAA                                       |
| MYLIP_4                   | TGAGGCTCCACGAAGAAGCTTGACT                                      |
| EHHADH_3                  | TTGGTCTCAGTCTGTGGCTGGATT                                       |
| EHHADH_4                  | GTGATTTGTGGAGCAGAGGGCAAA                                       |
| SYDE2_3                   | TTGACAGCAGGGAGCTTCAGAACA                                       |
| SYDE2_4                   | CCCATTCTGAGGATGATGACCTT                                        |
| ERCC5_3                   | CAAGCACTTAAAGGAGTCCGGGAT                                       |
| ERCC5_4                   | GCAGAGCCGATGAAACAAAGTGAG                                       |
| LEF1_3                    | TGCTTGCTGGCCACCTAACATCA                                        |
| LEF1_4                    | CCAGCGCACACACATTTGTACCAT                                       |
| ARAP2_3                   | TCGCGTTTAGGAGGAGACAGCTTA                                       |
| ARAP2_4                   | CACCGCAGTTGGAGACTGTTAGAA                                       |

Table S4: Plasmids used in this study

| Plasmid name               | Vector            | Origin       | Reference           |
|----------------------------|-------------------|--------------|---------------------|
| mCherry-TDP-43 WT          | pmCherry-C1       |              | This Study          |
| RNaseHI (Dead)-NLS-mCherry | pICE              |              | This Study          |
| SIRT2-WT-GFP               | pEGFP-N1          |              | Pereira et al, 2018 |
| SIRT2-S25A-GFP             | pEGFP-N1          |              | Pereira et al, 2018 |
| SIRT2-S25E-GFP             | pEGFP-N1          |              | Pereira et al, 2018 |
| H3-GFP WT                  | pEGFP-N1          | Fang-Lin Sun | Liu et al, 2012     |
| H3-GFP K18A                | pEGFP-N1          | Fang-Lin Sun | Liu et al, 2012     |
| H3-GFP K18Q                | pEGFP-N1          | Fang-Lin Sun | Liu et al, 2012     |
| NLS-mCherry                | pICE              | Addgene      | Britton et al, 2014 |
| RNaseHI-WT-NLS-mCherry     | pICE              | Addgene      | Britton et al, 2014 |
| TDP43 NOTAG1               | pCAG-EGFP/RFP-int | Addgene      | Yang et al, 2010    |
